# Supplementary material for: Evaluation of global simulations of aerosol particle number and cloud condensation nuclei, and implications for cloud droplet formation
Source: Copernicus journal article supplement (doi:10.5194/acp-2018-1340), 2019-01-18
Supplement: Supplementary file 1 [file acp-2018-1340-supplement.zip]

Archive with 3 entries (3 files):
- Fanourgakis-acp-2018-1340-supplementary-Table_S5_report_errors.xlsx
- Fanourgakis-acp-2018-1340-supplement_text_4_acpd.pdf
- Fanourgakis-acp-2018-1340-supplementary_figures.pdf
