# Supplementary material for: Evaluation of global simulations of aerosol particle number and cloud condensation nuclei, and implications for cloud droplet formation
Source: Copernicus journal article supplement (doi:10.5194/acp-2018-1340), 2019-01-18
Supplement: Supplementary file 1 [file Fanourgakis-acp-2018-1340-supplementary-Table_S5_report_errors.xlsx]

## Sheet: Finokalia
field=nact03
MODEL	AVER	ME	NMB	RMSE	IOA	MAE	NME
CAM5-Chem-APM	312.519	-53.9315	-14.7173	113.847	0.5064	93.2901	25.4579
CAM5-Chem-ATRAS2	324.303	-42.1466	-11.5014	136.656	0.5105	114.161	31.1534
CAM5-MAM4	236.385	-130.065	-35.4933	152.952	0.474	133.824	36.5192
CAM5_MAM3	201.789	-164.661	-44.9341	188.421	0.3613	170.572	46.5473
CAM5.3-Oslo	194.46	-171.991	-46.9344	219.362	0.3181	193.022	52.6737
ECHAM5.5-HAM2-ELVOC_UH	220.481	-145.969	-39.8332	174.686	0.4666	151.776	41.4181
ECHAM6-HAM2	201.463	-164.987	-45.0231	193.577	0.4241	169.977	46.385
ECHAM6-HAM2-AP	191.068	-175.382	-47.86	201.268	0.4086	178.434	48.6928
EMAC	276.166	-90.2838	-24.6375	277.069	0.2956	194.919	53.1912
GEOS-Chem-APM	324.917	-41.5326	-11.3338	101.161	0.6401	81.4308	22.2216
GEOS-Chem-TOMAS	259.365	-107.084	-29.2221	141.338	0.4783	123.572	33.7215
GISS-E2.1-MATRIX	308.288	-58.1617	-15.8717	114.812	0.3518	100.634	27.4619
TM4-ECPL	202.598	-163.851	-44.7133	193.471	0.4397	171.26	46.7349
TM5	217.891	-148.559	-40.5401	165.149	0.4762	150.282	41.0104
MMM	196.265	-170.185	-46.4415	196.861	0.4174	173.966	47.4734
Observations	366.449
modeldiversity	1.61286
field=nact06
MODEL	AVER	ME	NMB	RMSE	IOA	MAE	NME
CAM5-Chem-APM	518.327	-95.6124	-15.5736	229.537	0.5041	190.756	31.0708
CAM5-Chem-ATRAS2	487.138	-126.802	-20.6538	213.291	0.6188	175.698	28.6181
CAM5-MAM4	342.933	-271.007	-44.1422	311.682	0.5024	276.413	45.0229
CAM5_MAM3	275.249	-338.691	-55.1668	389.837	0.3853	347.171	56.5479
CAM5.3-Oslo	255.514	-358.425	-58.3811	418.756	0.3796	373.242	60.7945
ECHAM5.5-HAM2-ELVOC_UH	314.704	-299.236	-48.7402	342.079	0.502	305.051	49.6874
ECHAM6-HAM2	276.343	-337.596	-54.9885	380.416	0.4623	342.627	55.8078
ECHAM6-HAM2-AP	259.736	-354.203	-57.6934	394.139	0.4488	357.542	58.2373
EMAC	305.072	-308.868	-50.3092	423.072	0.4132	330.197	53.7833
GEOS-Chem-APM	508.233	-105.707	-17.2178	199.679	0.6636	162.972	26.5453
GEOS-Chem-TOMAS	387.697	-226.243	-36.851	291.209	0.521	254.154	41.3972
GISS-E2.1-MATRIX	531.361	-82.5781	-13.4505	240.043	0.3277	205.505	33.4731
TM4-ECPL	300.601	-313.338	-51.0372	344.863	0.4903	315.156	51.3334
TM5	290.713	-323.227	-52.6479	353.702	0.4832	324.921	52.9239
MMM	268.04	-345.901	-56.3411	386.627	0.4563	349.952	57.001
Observations	613.94
modeldiversity	1.70902
field=CCN02
MODEL	AVER	ME	NMB	RMSE	IOA	MAE	NME
CAM5-Chem-APM	868.67	507.317	140.394	678.188	0.3776	545.188	150.874
CAM5-Chem-ATRAS2	800.585	439.231	121.552	537.654	0.5785	446.464	123.554
CAM5-MAM4	450.055	88.7018	24.5472	219.069	0.802	171.086	47.346
CAM5_MAM3	341.849	-19.5041	-5.3975	278.506	0.4584	200.26	55.4197
CAM5.3-Oslo	375.435	14.0821	3.8971	329.418	0.5192	227.315	62.9068
ECHAM5.5-HAM2-ELVOC_UH	424.888	63.5358	17.5828	237.565	0.8038	179.799	49.7571
ECHAM6-HAM2	380.365	19.012	5.2614	207.724	0.8331	156.883	43.4154
ECHAM6-HAM2-AP	352.118	-9.2348	-2.5556	201.531	0.833	152.242	42.1311
EMAC	406.248	44.8948	12.4241	254.505	0.7543	193.439	53.532
GEOS-Chem-APM	845.81	484.458	134.068	631.124	0.451	505.477	139.885
GEOS-Chem-TOMAS	565.537	204.185	56.5057	393.355	0.5184	300.948	83.2839
GISS-E2.1-MATRIX	886.848	525.493	145.424	755.391	0.2808	573.825	158.799
TM4-ECPL	337.784	-23.5678	-6.5221	195.889	0.833	143.461	39.7012
TM5	387.402	26.0498	7.209	205.817	0.7918	153.532	42.4883
MMM	366.241	4.8885	1.3528	201.893	0.8365	152.498	42.2021
Observations	361.352
modeldiversity	2.24431
field=CCN08
MODEL	AVER	ME	NMB	RMSE	IOA	MAE	NME
CAM5-Chem-APM	1674.57	181.199	12.1335	1108.39	0.3376	852.997	57.1189
CAM5-Chem-ATRAS2	1105.57	-387.801	-25.9682	831.906	0.5451	607.505	40.6802
CAM5-MAM4	689.762	-803.608	-53.8118	1070.39	0.5069	846.267	56.6683
CAM5_MAM3	543.669	-949.702	-63.5946	1261.04	0.4207	1007.86	67.4891
CAM5.3-Oslo	561.339	-932.031	-62.4113	1220.75	0.4701	994.985	66.6268
ECHAM5.5-HAM2-ELVOC_UH	656.056	-837.314	-56.0688	1053.09	0.5507	860.606	57.6285
ECHAM6-HAM2	461.381	-1031.98	-69.1044	1236.34	0.4981	1039.39	69.6002
ECHAM6-HAM2-AP	433.918	-1059.45	-70.9436	1262.02	0.4903	1064.5	71.2816
EMAC	508.926	-984.443	-65.9209	1227.3	0.4793	1016.86	68.0919
GEOS-Chem-APM	1756.11	262.739	17.5937	909.219	0.6702	667.47	44.6956
GEOS-Chem-TOMAS	970.848	-522.523	-34.9895	930.048	0.5984	724.092	48.4872
GISS-E2.1-MATRIX	2868.18	1374.82	92.0615	2160.75	0.219	1559.91	104.456
TM4-ECPL	1381.88	-111.485	-7.4653	601.888	0.8224	434.387	29.0877
TM5	666.091	-827.278	-55.3968	1037.46	0.5722	841.433	56.3446
MMM	447.65	-1045.72	-70.0243	1248.67	0.4944	1051.78	70.43
Observations	1493.37
modeldiversity	3.13886
field=CCN10
MODEL	AVER	ME	NMB	RMSE	IOA	MAE	NME
CAM5-Chem-APM	1780.31	205.088	13.0196	1213.23	0.2895	916.797	58.2011
CAM5-Chem-ATRAS2	1156.38	-418.846	-26.5896	881.669	0.5131	642.669	40.7986
CAM5-MAM4	721.014	-854.211	-54.2279	1127.99	0.4936	891.536	56.5975
CAM5_MAM3	558.258	-1016.97	-64.5602	1334.83	0.4059	1073.28	68.1352
CAM5.3-Oslo	585.274	-989.947	-62.8449	1275.38	0.4712	1043.14	66.2219
ECHAM5.5-HAM2-ELVOC_UH	750.999	-824.222	-52.3242	1058.13	0.549	856.56	54.3771
ECHAM6-HAM2	491.441	-1083.78	-68.8018	1296.57	0.4861	1091.44	69.2878
ECHAM6-HAM2-AP	462.527	-1112.69	-70.6373	1322.1	0.4798	1117.88	70.9665
EMAC	528.077	-1047.15	-66.4761	1290.65	0.4709	1073.48	68.1481
GEOS-Chem-APM	1910.32	335.092	21.2727	1016.16	0.6389	732.384	46.494
GEOS-Chem-TOMAS	1110.59	-464.63	-29.4962	979.575	0.5926	748.559	47.5209
GISS-E2.1-MATRIX	3250.22	1674.99	106.334	2516.6	0.1972	1834.45	116.457
TM4-ECPL	1594.78	19.5557	1.2415	621.538	0.8255	449.837	28.5571
TM5	781.355	-793.869	-50.3973	1027.06	0.5938	820.844	52.1097
MMM	476.983	-1098.24	-69.7196	1308.82	0.4831	1104.49	70.1165
Observations	1575.22
modeldiversity	3.2537
field=N50
MODEL	AVER	ME	NMB	RMSE	IOA	MAE	NME
CAM5-Chem-APM	1397.62	-333.014	-19.2423	1002.8	0.4914	778.024	44.956
CAM5-Chem-ATRAS2	1022.82	-707.812	-40.899	1048.1	0.561	798.697	46.1505
CAM5-MAM4	669.432	-1061.2	-61.3188	1320.44	0.4955	1092.18	63.1088
CAM5_MAM3	497.42	-1233.22	-71.2581	1524.23	0.4329	1255.92	72.5697
CAM5.3-Oslo	7385.07	5654.44	326.726	8135.68	0.1449	5783.67	334.193
ECHAM5.5-HAM2-ELVOC_UH	606.725	-1123.91	-64.9422	1335.4	0.523	1132	65.4098
ECHAM6-HAM2	459.034	-1271.6	-73.4759	1480.96	0.4894	1275.13	73.6798
ECHAM6-HAM2-AP	431.561	-1299.08	-75.0636	1509.23	0.4812	1301.39	75.1972
EMAC	573.651	-1156.99	-66.8533	1419.38	0.4755	1186.91	68.5823
GEOS-Chem-APM	1463.55	-267.083	-15.4326	767.477	0.7673	570.81	32.9827
GEOS-Chem-TOMAS	1118.09	-612.546	-35.3943	1032.06	0.6376	819.486	47.3518
GISS-E2.1-MATRIX	2194.24	463.605	26.7882	1418.7	0.2801	1009.39	58.3249
TM4-ECPL	522.931	-1207.7	-69.7839	1411.92	0.4999	1209.79	69.9046
TM5	578.383	-1152.25	-66.5798	1361.07	0.5134	1157.07	66.8583
MMM	445.299	-1285.34	-74.2696	1494.7	0.4854	1288.01	74.4244
Observations	1730.63
modeldiversity	4.59919
field=N80
MODEL	AVER	ME	NMB	RMSE	IOA	MAE	NME
CAM5-Chem-APM	1029.36	-216.529	-17.3795	719.595	0.568	540.173	43.3564
CAM5-Chem-ATRAS2	876.811	-369.076	-29.6235	649.708	0.6708	475.209	38.1421
CAM5-MAM4	549.312	-696.576	-55.9099	904.34	0.5369	728.517	58.4736
CAM5_MAM3	406.453	-839.434	-67.3763	1083.59	0.4527	864.988	69.4273
CAM5.3-Oslo	2145.81	899.93	72.2319	1734.06	0.4235	1227.97	98.5621
ECHAM5.5-HAM2-ELVOC_UH	478.044	-767.845	-61.6302	940.605	0.5538	778.657	62.4981
ECHAM6-HAM2	407.993	-837.898	-67.253	1012.77	0.5273	845.234	67.8418
ECHAM6-HAM2-AP	390.033	-855.857	-68.6945	1032.6	0.5175	863.076	69.2739
EMAC	493.179	-752.709	-60.4154	978.854	0.5056	796.701	63.9463
GEOS-Chem-APM	989.331	-256.558	-20.5923	584.292	0.7422	435.242	34.9342
GEOS-Chem-TOMAS	830.069	-415.819	-33.3753	737.045	0.6452	568.924	45.6641
GISS-E2.1-MATRIX	1317.84	71.9576	5.7756	918.075	0.3212	672.1	53.9454
TM4-ECPL	235.85	-1010.04	-81.0697	1170.72	0.4783	1010.27	81.0886
TM5	437.579	-808.308	-64.878	984.293	0.5286	815.362	65.4442
MMM	399.012	-846.875	-67.9735	1022.18	0.5226	853.582	68.5119
Observations	1245.89
modeldiversity	2.88396
field=N120
MODEL	AVER	ME	NMB	RMSE	IOA	MAE	NME
CAM5-Chem-APM	706.924	-134.869	-16.0216	518.7	0.5424	389.334	46.2505
CAM5-Chem-ATRAS2	649.577	-192.214	-22.8338	385.582	0.7772	290.638	34.526
CAM5-MAM4	410.645	-431.148	-51.2178	563.274	0.5714	455.728	54.1378
CAM5_MAM3	301.478	-540.316	-64.1863	705.942	0.46	562.382	66.8076
CAM5.3-Oslo	666.449	-175.343	-20.8297	525.155	0.5615	412.463	48.9982
ECHAM5.5-HAM2-ELVOC_UH	364.422	-477.372	-56.7089	593.952	0.5765	491.167	58.3477
ECHAM6-HAM2	327.305	-514.487	-61.1181	635.404	0.5472	524.923	62.3577
ECHAM6-HAM2-AP	323.045	-518.749	-61.6242	642.551	0.5384	531.174	63.1003
EMAC	389.015	-452.778	-53.7873	621.297	0.5123	500.161	59.4162
GEOS-Chem-APM	612.163	-229.63	-27.2786	426.779	0.6862	324.497	38.5483
GEOS-Chem-TOMAS	668.362	-173.431	-20.6026	458.716	0.6642	344.402	40.9129
GISS-E2.1-MATRIX	633.786	-208.006	-24.7098	576.99	0.406	450.791	53.5512
TM4-ECPL	160.086	-681.706	-80.9827	785.95	0.4781	682.082	81.0273
TM5	350.245	-491.549	-58.3931	607.17	0.5582	499.476	59.3347
MMM	325.175	-516.617	-61.371	638.429	0.5432	527.202	62.6284
Observations	841.793
modeldiversity	2.12447
field=SO4_PM1
MODEL	AVER	ME	NMB	RMSE	IOA	MAE	NME
CAM5-Chem-APM	3.7631	-0.004	-0.105	3.1458	0.4641	2.332	61.9051
CAM5-Chem-ATRAS2	6.1248	2.3577	62.587	5.1079	0.5762	3.2419	86.0585
CAM5-MAM4	6.2399	2.4728	65.6433	4.4463	0.6369	3.111	82.5847
CAM5_MAM3	4.2675	0.5004	13.284	2.6617	0.6389	1.9851	52.6972
CAM5.3-Oslo	6.2155	2.4485	64.9965	4.1802	0.5024	3.3058	87.7555
ECHAM5.5-HAM2-ELVOC_UH	4.5654	0.7983	21.1926	3.4622	0.6212	2.3311	61.8806
ECHAM6-HAM2	4.3253	0.5583	14.8202	3.2704	0.5771	2.3095	61.3063
ECHAM6-HAM2-AP	3.8143	0.0473	1.2549	2.8792	0.6361	2.1118	56.0595
EMAC	5.459	1.692	44.9145	3.6687	0.6739	2.613	69.3646
GEOS-Chem-APM	2.7842	-0.9829	-26.091	2.1197	0.6915	1.5753	41.8183
GEOS-Chem-TOMAS	2.3612	-1.4059	-37.3201	2.4839	0.5865	1.8585	49.3365
GISS-E2.1-MATRIX	3.9944	0.2273	6.0333	4.2654	0.2693	2.9377	77.9825
TM4-ECPL	2.2964	-1.4707	-39.0402	2.6934	0.5913	2.1228	56.3508
TM5	1.1755	-2.5915	-68.7945	3.2788	0.5263	2.6203	69.5574
MMM	4.0698	0.3028	8.0376	3.0174	0.6127	2.1824	57.9336
Observations	3.7671
modeldiversity	2.34041
field=BC_PM1
MODEL	AVER	ME	NMB	RMSE	IOA	MAE	NME
CAM5-Chem-APM	0.2245	-0.151	-40.2106	0.3151	0.4031	0.2084	55.4887
CAM5-Chem-ATRAS2	0.2447	-0.1308	-34.8338	0.2604	0.5834	0.1625	43.2868
CAM5-MAM4	0.208	-0.1675	-44.6122	0.2779	0.5361	0.1795	47.8032
CAM5_MAM3	0.1479	-0.2276	-60.6081	0.3202	0.5037	0.2345	62.4389
CAM5.3-Oslo	0.3128	-0.0627	-16.6969	0.3133	0.3671	0.2199	58.5566
ECHAM5.5-HAM2-ELVOC_UH	0.1827	-0.1928	-51.3508	0.2843	0.5655	0.2001	53.2859
ECHAM6-HAM2	0.1843	-0.1912	-50.9114	0.2885	0.5417	0.2013	53.6102
ECHAM6-HAM2-AP	0.1628	-0.2127	-56.6498	0.3037	0.5273	0.2186	58.2144
EMAC	0.0813	-0.2942	-78.3537	0.3787	0.4449	0.2968	79.034
GEOS-Chem-APM	0.0754	-0.3001	-79.9119	0.3882	0.4259	0.3004	79.9957
GEOS-Chem-TOMAS	0.1598	-0.2157	-57.434	0.3224	0.4598	0.2209	58.8229
GISS-E2.1-MATRIX	0.1688	-0.2067	-55.0373	0.3059	0.5097	0.2179	58.0352
TM4-ECPL	0.1842	-0.1913	-50.9426	0.2903	0.5269	0.1972	52.5238
TM5	0.1822	-0.1933	-51.4713	0.2889	0.5402	0.2035	54.1892
MMM	0.1736	-0.2019	-53.7806	0.2957	0.5347	0.2096	55.8095
Observations	0.3755
modeldiversity	2.15997
field=ORG_PM1
MODEL	AVER	ME	NMB	RMSE	IOA	MAE	NME
CAM5-Chem-APM	3.4874	0.4414	14.4902	3.4905	0.5443	2.4566	80.6477
CAM5-Chem-ATRAS2	3.2747	0.2287	7.5074	2.9969	0.644	1.9433	63.7974
CAM5-MAM4	2.224	-0.8221	-26.9875	1.9464	0.7343	1.3389	43.9537
CAM5_MAM3	1.0066	-2.0394	-66.9526	2.702	0.5059	2.0936	68.731
CAM5.3-Oslo	2.0711	-0.975	-32.0089	2.2584	0.5709	1.6826	55.2385
ECHAM5.5-HAM2-ELVOC_UH	1.1028	-1.9433	-63.7968	2.5469	0.566	1.9835	65.1184
ECHAM6-HAM2	0.8917	-2.1543	-70.7252	2.7348	0.525	2.1795	71.5501
ECHAM6-HAM2-AP	0.8042	-2.2419	-73.6001	2.8046	0.5191	2.2549	74.0269
EMAC	0.2665	-2.7796	-91.2509	3.333	0.4527	2.7801	91.2696
GEOS-Chem-APM	1.4682	-1.5778	-51.7992	2.3687	0.6367	1.7608	57.8046
GEOS-Chem-TOMAS	1.8072	-1.2389	-40.6725	1.9725	0.6532	1.3672	44.8833
GISS-E2.1-MATRIX	0.8685	-2.1776	-71.489	2.7549	0.5143	2.1898	71.8909
TM4-ECPL	0.9179	-2.1281	-69.8647	2.6781	0.5351	2.1411	70.2901
TM5	0.5444	-2.5017	-82.1283	3.0594	0.48	2.5049	82.2355
MMM	0.8479	-2.1981	-72.1625	2.7689	0.5221	2.2164	72.7642
Observations	3.0461
modeldiversity	3.13729
field=SS_PM1
MODEL	AVER	ME	NMB	RMSE	IOA	MAE	NME
CAM5-Chem-APM	4.4106	4.3656	9702.34	5.6077	0.007	4.3662	9703.6
CAM5-Chem-ATRAS2	0.6087	0.5637	1252.85	0.7492	0.0714	0.566	1257.93
CAM5-MAM4	0.6482	0.6032	1340.55	0.784	0.0788	0.6043	1343.11
CAM5_MAM3	1.1027	1.0577	2350.6	1.3415	0.0423	1.0581	2351.61
CAM5.3-Oslo	0.0963	0.0513	113.989	0.1266	0.1884	0.0804	178.732
ECHAM5.5-HAM2-ELVOC_UH	0.2326	0.1876	416.833	0.2441	0.1878	0.1919	426.456
ECHAM6-HAM2	0.9826	0.9376	2083.76	1.1997	0.0466	0.9385	2085.67
ECHAM6-HAM2-AP	1.4431	1.3981	3107.15	1.8383	0.0285	1.3989	3109.07
EMAC	0.6517	0.6067	1348.41	0.7758	0.0658	0.6082	1351.72
GEOS-Chem-APM	1.9363	1.8913	4203.23	3.7239	0.0142	1.8919	4204.54
GEOS-Chem-TOMAS	1.0335	0.9885	2196.96	1.2832	0.0413	0.9891	2198.33
GISS-E2.1-MATRIX	2.2105	2.1655	4812.66	2.942	0.0194	2.1655	4812.66
TM4-ECPL	3.616	3.571	7936.4	4.5082	0.0135	3.571	7936.4
TM5	0.1998	0.1548	343.976	0.1876	0.2346	0.1587	352.656
MMM	1.2128	1.1678	2595.45	1.4944	0.0366	1.1686	2597.25
Observations	0.045
modeldiversity	4.44994
field=nact03
MODEL	AVER	ME	NMB	RMSE	IOA	MAE	NME
CAM5-Chem-APM	312.519	-53.9315	-14.7173	113.847	0.5064	93.2901	25.4579
CAM5-Chem-ATRAS2	324.303	-42.1466	-11.5014	136.656	0.5105	114.161	31.1534
CAM5-MAM4	236.385	-130.065	-35.4933	152.952	0.474	133.824	36.5192
CAM5_MAM3	201.789	-164.661	-44.9341	188.421	0.3613	170.572	46.5473
CAM5.3-Oslo	194.46	-171.991	-46.9344	219.362	0.3181	193.022	52.6737
ECHAM5.5-HAM2-ELVOC_UH	220.481	-145.969	-39.8332	174.686	0.4666	151.776	41.4181
ECHAM6-HAM2	201.463	-164.987	-45.0231	193.577	0.4241	169.977	46.385
ECHAM6-HAM2-AP	191.068	-175.382	-47.86	201.268	0.4086	178.434	48.6928
EMAC	276.166	-90.2838	-24.6375	277.069	0.2956	194.919	53.1912
GEOS-Chem-APM	324.917	-41.5326	-11.3338	101.161	0.6401	81.4308	22.2216
GEOS-Chem-TOMAS	259.365	-107.084	-29.2221	141.338	0.4783	123.572	33.7215
GISS-E2.1-MATRIX	308.288	-58.1617	-15.8717	114.812	0.3518	100.634	27.4619
TM4-ECPL	202.598	-163.851	-44.7133	193.471	0.4397	171.26	46.7349
TM5	217.891	-148.559	-40.5401	165.149	0.4762	150.282	41.0104
MMM	196.265	-170.185	-46.4415	196.861	0.4174	173.966	47.4734
Observations	366.449
modeldiversity	1.61286
field=nact06
MODEL	AVER	ME	NMB	RMSE	IOA	MAE	NME
CAM5-Chem-APM	518.327	-95.6124	-15.5736	229.537	0.5041	190.756	31.0708
CAM5-Chem-ATRAS2	487.138	-126.802	-20.6538	213.291	0.6188	175.698	28.6181
CAM5-MAM4	342.933	-271.007	-44.1422	311.682	0.5024	276.413	45.0229
CAM5_MAM3	275.249	-338.691	-55.1668	389.837	0.3853	347.171	56.5479
CAM5.3-Oslo	255.514	-358.425	-58.3811	418.756	0.3796	373.242	60.7945
ECHAM5.5-HAM2-ELVOC_UH	314.704	-299.236	-48.7402	342.079	0.502	305.051	49.6874
ECHAM6-HAM2	276.343	-337.596	-54.9885	380.416	0.4623	342.627	55.8078
ECHAM6-HAM2-AP	259.736	-354.203	-57.6934	394.139	0.4488	357.542	58.2373
EMAC	305.072	-308.868	-50.3092	423.072	0.4132	330.197	53.7833
GEOS-Chem-APM	508.233	-105.707	-17.2178	199.679	0.6636	162.972	26.5453
GEOS-Chem-TOMAS	387.697	-226.243	-36.851	291.209	0.521	254.154	41.3972
GISS-E2.1-MATRIX	531.361	-82.5781	-13.4505	240.043	0.3277	205.505	33.4731
TM4-ECPL	300.601	-313.338	-51.0372	344.863	0.4903	315.156	51.3334
TM5	290.713	-323.227	-52.6479	353.702	0.4832	324.921	52.9239
MMM	268.04	-345.901	-56.3411	386.627	0.4563	349.952	57.001
Observations	613.94
modeldiversity	1.70902

## Sheet: Cabauw
field=nact03
MODEL	AVER	ME	NMB	RMSE	IOA	MAE	NME
CAM5-Chem-APM	287.746	85.776	42.4696	204.018	0.3162	164.904	81.6478
CAM5-Chem-ATRAS2	352.702	150.732	74.631	200.494	0.366	159.108	78.7779
CAM5-MAM4	280.994	79.0238	39.1265	114.344	0.553	92.0003	45.5514
CAM5_MAM3	282.528	80.5587	39.8864	114.619	0.559	90.0443	44.583
CAM5.3-Oslo	121.207	-80.7624	-39.9873	120.067	0.4563	98.1691	48.6057
ECHAM5.5-HAM2-ELVOC_UH	117.93	-84.0401	-41.6101	118.168	0.4605	94.272	46.6762
ECHAM6-HAM2	182.981	-18.9878	-9.4013	111.802	0.4725	90.5734	44.8449
ECHAM6-HAM2-AP	174.374	-27.5958	-13.6633	114.489	0.403	91.4871	45.2973
EMAC	226.61	24.6391	12.1994	200.772	0.334	146.383	72.4774
GEOS-Chem-APM	406.838	204.869	101.435	252.548	0.3413	209.466	103.711
GEOS-Chem-TOMAS	368.574	166.603	82.489	201.366	0.3991	170.691	84.513
GISS-E2.1-MATRIX	364.668	162.699	80.5559	190.937	0.4413	163.999	81.1994
TM4-ECPL	304.512	102.542	50.7707	157.186	0.4377	109.339	54.1362
TM5	229.47	27.5	13.6159	120.556	0.6393	92.0169	45.5597
MMM	178.678	-23.2918	-11.5323	109.681	0.4422	88.1224	43.6314
Observations	201.97
modeldiversity	1.77058
field=nact06
MODEL	AVER	ME	NMB	RMSE	IOA	MAE	NME
CAM5-Chem-APM	470.449	123.581	35.6277	359.776	0.321	286.392	82.5651
CAM5-Chem-ATRAS2	546.307	199.438	57.4967	288.108	0.4403	223.865	64.5391
CAM5-MAM4	416.27	69.4012	20.008	168.924	0.6241	126.607	36.5001
CAM5_MAM3	420.858	73.9904	21.331	158.688	0.6472	117.974	34.0111
CAM5.3-Oslo	157.429	-189.44	-54.6144	243.46	0.4337	206.34	59.4868
ECHAM5.5-HAM2-ELVOC_UH	160.128	-186.74	-53.8361	239.064	0.4403	198.651	57.27
ECHAM6-HAM2	239.555	-107.313	-30.9378	221.215	0.4487	179.277	51.6846
ECHAM6-HAM2-AP	221.235	-125.633	-36.2193	225.918	0.418	182.175	52.5201
EMAC	288.426	-58.4414	-16.8483	297.32	0.3992	223.253	64.3626
GEOS-Chem-APM	651.841	304.972	87.9218	402.103	0.3764	323.358	93.2224
GEOS-Chem-TOMAS	548.764	201.895	58.2052	275.366	0.4558	219.317	63.2277
GISS-E2.1-MATRIX	643.446	296.577	85.5015	365.562	0.4301	299.893	86.4574
TM4-ECPL	509.962	163.094	47.0191	211.388	0.5205	171.776	49.522
TM5	280.278	-66.5904	-19.1976	186.631	0.6614	153.673	44.3032
MMM	230.396	-116.473	-33.5786	220.467	0.4364	177.971	51.308
Observations	346.868
modeldiversity	2.0525
field=CCN02
MODEL	AVER	ME	NMB	RMSE	IOA	MAE	NME
CAM5-Chem-APM	750.498	-326.102	-30.2901	1146.26	0.4532	850.332	78.9833
CAM5-Chem-ATRAS2	1050.49	-26.1029	-2.4246	923.553	0.6616	587.366	54.5576
CAM5-MAM4	505.508	-571.092	-53.046	945.259	0.5377	628.44	58.3728
CAM5_MAM3	463.64	-612.957	-56.9346	988.303	0.5026	667.338	61.9859
CAM5.3-Oslo	167.941	-908.659	-84.401	1222.14	0.4529	911.472	84.6623
ECHAM5.5-HAM2-ELVOC_UH	215.26	-861.337	-80.0055	1173.61	0.4698	867.069	80.5379
ECHAM6-HAM2	296.199	-780.398	-72.4874	1125.88	0.4765	804.084	74.6876
ECHAM6-HAM2-AP	274.67	-801.928	-74.4872	1153.84	0.4585	820.363	76.1996
EMAC	395.209	-681.389	-63.291	1044.29	0.5322	743.497	69.0599
GEOS-Chem-APM	1129.15	52.549	4.881	924.91	0.6596	616.772	57.289
GEOS-Chem-TOMAS	673.427	-403.172	-37.4487	877.974	0.5205	582.73	54.127
GISS-E2.1-MATRIX	942.428	-134.171	-12.4625	792.745	0.7346	555.862	51.6314
TM4-ECPL	541.357	-535.24	-49.7159	917.392	0.5933	626.823	58.2226
TM5	373.719	-702.882	-65.2874	998.634	0.5467	724.619	67.3064
MMM	285.435	-791.164	-73.4875	1138.33	0.4677	810.048	75.2415
Observations	1076.6
modeldiversity	2.91707
field=CCN10
MODEL	AVER	ME	NMB	RMSE	IOA	MAE	NME
CAM5-Chem-APM	1902.9	-555.509	-22.5963	2131.14	0.4529	1652.37	67.2128
CAM5-Chem-ATRAS2	1632.77	-825.651	-33.5848	1662.09	0.6355	1212.87	49.3355
CAM5-MAM4	1155.05	-1303.37	-53.0166	1793.44	0.5795	1387.15	56.4245
CAM5_MAM3	1184.3	-1274.12	-51.8268	1877.46	0.541	1450.1	58.9852
CAM5.3-Oslo	280.565	-2177.86	-88.5879	2574.2	0.4402	2182.62	88.7815
ECHAM5.5-HAM2-ELVOC_UH	356.042	-2102.37	-85.5176	2502.57	0.4477	2103.97	85.5824
ECHAM6-HAM2	441.195	-2017.22	-82.0539	2432.77	0.4548	2029.85	82.5674
ECHAM6-HAM2-AP	401.543	-2056.87	-83.6665	2469.28	0.4494	2061.1	83.8387
EMAC	650.205	-1808.2	-73.5517	2234.7	0.4858	1836.2	74.6906
GEOS-Chem-APM	2350.97	-107.443	-4.3704	1728.9	0.6105	1229.87	50.0268
GEOS-Chem-TOMAS	1931.35	-527.064	-21.4392	1511.3	0.6033	1108.51	45.0906
GISS-E2.1-MATRIX	4608.74	2150.32	87.4677	3312.24	0.4626	2453.4	99.7962
TM4-ECPL	8684.56	6226.14	253.259	7074.36	0.2864	6233.23	253.547
TM5	518.356	-1940.06	-78.9152	2338.72	0.4697	1946.36	79.1716
MMM	421.369	-2037.04	-82.8602	2449.88	0.4523	2044.6	83.1677
Observations	2458.41
modeldiversity	4.79274
field=N50
MODEL	AVER	ME	NMB	RMSE	IOA	MAE	NME
CAM5-Chem-APM	1450.29	-770.497	-34.6948	1818.17	0.4316	1455.54	65.5415
CAM5-Chem-ATRAS2	1158.74	-1062.06	-47.8234	1559.22	0.5913	1276.66	57.4867
CAM5-MAM4	1299.62	-921.166	-41.4793	1428.21	0.5946	1164.09	52.4178
CAM5_MAM3	741.606	-1479.18	-66.6062	1829.42	0.5109	1571.99	70.7855
CAM5.3-Oslo	2131.24	-89.5499	-4.0324	2361.39	0.478	1435.12	64.6224
ECHAM5.5-HAM2-ELVOC_UH	774.659	-1446.13	-65.1181	1847.31	0.4952	1565.86	70.5093
ECHAM6-HAM2	394.762	-1826.03	-82.2244	2131.54	0.4491	1838.22	82.7732
ECHAM6-HAM2-AP	354.973	-1865.82	-84.0161	2174.46	0.4407	1875.22	84.4393
EMAC	1499.2	-721.589	-32.4925	1515.53	0.5755	1207.78	54.3853
GEOS-Chem-APM	1372.85	-847.936	-38.1818	1392.39	0.618	1125.13	50.6635
GEOS-Chem-TOMAS	2127.03	-93.7566	-4.2218	1342.69	0.5978	1045.92	47.097
GISS-E2.1-MATRIX	3554.97	1334.18	60.0771	2512.41	0.4955	1698.93	76.5014
TM4-ECPL	4509	2288.21	103.036	3014.94	0.4124	2333.43	105.072
TM5	392.659	-1828.13	-82.3191	2104.11	0.4564	1843.39	83.0064
MMM	374.867	-1845.92	-83.1202	2152.08	0.4449	1856.12	83.5797
Observations	2220.79
modeldiversity	3.23881
field=N80
MODEL	AVER	ME	NMB	RMSE	IOA	MAE	NME
CAM5-Chem-APM	981.153	-396.448	-28.7781	1203.76	0.4306	970.168	70.4243
CAM5-Chem-ATRAS2	988.085	-389.519	-28.2751	952.367	0.6327	725.868	52.6906
CAM5-MAM4	1016.48	-361.122	-26.2138	863.832	0.6265	662.592	48.0974
CAM5_MAM3	538.092	-839.509	-60.9398	1105.59	0.5345	915.158	66.4312
CAM5.3-Oslo	903.106	-474.496	-34.4436	1021.8	0.5725	753.099	54.6673
ECHAM5.5-HAM2-ELVOC_UH	394.263	-983.337	-71.3802	1223.12	0.4835	1024.06	74.3361
ECHAM6-HAM2	313.353	-1064.25	-77.2535	1286.97	0.4695	1077.23	78.1958
ECHAM6-HAM2-AP	301.738	-1075.87	-78.0969	1304.19	0.4594	1086.21	78.8476
EMAC	823.463	-554.138	-40.2248	994.332	0.5619	783.036	56.8405
GEOS-Chem-APM	1060.57	-317.03	-23.0131	867.396	0.6652	670.323	48.6586
GEOS-Chem-TOMAS	1873.59	495.983	36.0033	1259.58	0.4979	874.402	63.4727
GISS-E2.1-MATRIX	2021.13	643.532	46.7138	1485.69	0.5237	986.473	71.6079
TM4-ECPL	781.625	-595.976	-43.2617	953.918	0.5539	759.674	55.1446
TM5	294.267	-1083.34	-78.6391	1277.65	0.4783	1095.43	79.5169
MMM	307.545	-1070.06	-77.6753	1294.69	0.4647	1081.2	78.484
Observations	1377.6
modeldiversity	2.79837
field=N120
MODEL	AVER	ME	NMB	RMSE	IOA	MAE	NME
CAM5-Chem-APM	623.698	-210.75	-25.2562	793.739	0.4243	625.779	74.9933
CAM5-Chem-ATRAS2	796.456	-37.9903	-4.5528	688.853	0.6353	479.11	57.4165
CAM5-MAM4	742.401	-92.046	-11.0308	551.081	0.6638	402.892	48.2826
CAM5_MAM3	394.727	-439.721	-52.6961	649.979	0.5782	507.223	60.7856
CAM5.3-Oslo	427.409	-407.039	-48.7796	643.535	0.5544	482.176	57.784
ECHAM5.5-HAM2-ELVOC_UH	191.956	-642.493	-76.9963	801.824	0.4841	652.428	78.1869
ECHAM6-HAM2	262.775	-571.674	-68.5094	754.503	0.5012	592.046	70.9507
ECHAM6-HAM2-AP	263.094	-571.354	-68.471	761.413	0.4872	590.802	70.8017
EMAC	523.979	-310.466	-37.2063	638.731	0.5926	487.377	58.4072
GEOS-Chem-APM	788.718	-45.7295	-5.4802	583.451	0.7016	424.917	50.922
GEOS-Chem-TOMAS	1649.92	815.478	97.7269	1277.11	0.415	894.246	107.166
GISS-E2.1-MATRIX	1038.49	204.041	24.4523	787.148	0.6171	534.033	63.9985
TM4-ECPL	241.428	-593.018	-71.0672	756.805	0.5135	615.123	73.7163
TM5	287.629	-546.819	-65.5308	702.473	0.5464	568.871	68.1735
MMM	262.935	-571.515	-68.4903	756.899	0.4944	590.426	70.7567
Observations	834.446
modeldiversity	3.11643
field=SO4_PM1
MODEL	AVER	ME	NMB	RMSE	IOA	MAE	NME
CAM5-Chem-APM	1.6487	0.6334	62.3831	1.893	0.2918	1.3357	131.549
CAM5-Chem-ATRAS2	1.7282	0.7128	70.2043	1.9045	0.5485	1.1011	108.451
CAM5-MAM4	1.7508	0.7355	72.4359	1.6535	0.4327	1.2048	118.664
CAM5_MAM3	1.358	0.3426	33.7449	0.9769	0.724	0.6989	68.8381
CAM5.3-Oslo	2.5039	1.4885	146.602	2.5118	0.3362	1.7714	174.467
ECHAM5.5-HAM2-ELVOC_UH	2.3329	1.3175	129.764	4.2993	0.257	1.6797	165.428
ECHAM6-HAM2	2.8773	1.862	183.385	3.2184	0.3616	2.0687	203.742
ECHAM6-HAM2-AP	2.1324	1.117	110.016	2.1979	0.4366	1.4595	143.742
EMAC	1.6129	0.5975	58.8518	1.5418	0.5485	1.0057	99.054
GEOS-Chem-APM	0.9658	-0.0495	-4.8759	1.0043	0.5927	0.5988	58.9772
GEOS-Chem-TOMAS	1.1227	0.1074	10.5771	0.9385	0.6258	0.6493	63.9534
GISS-E2.1-MATRIX	1.1378	0.1224	12.0573	1.0434	0.5828	0.6937	68.3259
TM4-ECPL	1.803	0.7876	77.5731	1.5679	0.6039	1.0106	99.5371
TM5	0.2996	-0.7158	-70.4959	1.202	0.4574	0.7284	71.7355
MMM	2.5049	1.4895	146.701	2.6199	0.4104	1.7339	170.772
Observations	1.0153
modeldiversity	2.42957
field=BC_PM1
MODEL	AVER	ME	NMB	RMSE	IOA	MAE	NME
CAM5-Chem-APM	0.704	0.4565	184.484	0.7793	0.1843	0.55	222.273
CAM5-Chem-ATRAS2	0.9681	0.7207	291.246	1.2117	0.1544	0.7734	312.543
CAM5-MAM4	1.0719	0.8244	333.163	1.1594	0.1855	0.8495	343.298
CAM5_MAM3	0.4746	0.2272	91.812	0.5624	0.2931	0.3589	145.041
CAM5.3-Oslo	0.8069	0.5595	226.089	0.9528	0.1885	0.626	252.98
ECHAM5.5-HAM2-ELVOC_UH	1.0147	0.7672	310.05	1.2197	0.1714	0.8103	327.456
ECHAM6-HAM2	1.1326	0.8852	357.721	1.3907	0.1479	0.9251	373.837
ECHAM6-HAM2-AP	0.9966	0.7492	302.75	1.1996	0.1594	0.7964	321.847
EMAC	0.9233	0.6759	273.137	1.0408	0.2007	0.7098	286.831
GEOS-Chem-APM	0.8182	0.5708	230.655	0.8095	0.2534	0.6026	243.505
GEOS-Chem-TOMAS	0.8475	0.6001	242.507	0.8447	0.2559	0.6319	255.368
GISS-E2.1-MATRIX	0.5068	0.2594	104.81	0.4896	0.33	0.3538	142.994
TM4-ECPL	1.7773	1.5299	618.252	1.942	0.1292	1.532	619.098
TM5	0.5967	0.3493	141.148	0.6257	0.3074	0.4281	173.005
MMM	1.0646	0.8172	330.236	1.2776	0.1571	0.8588	347.05
Observations	0.2475
modeldiversity	2.07307
field=ORG_PM1
MODEL	AVER	ME	NMB	RMSE	IOA	MAE	NME
CAM5-Chem-APM	2.2277	-0.6341	-22.1571	3.1576	0.3545	2.3059	80.5734
CAM5-Chem-ATRAS2	1.5107	-1.3511	-47.2113	3.1963	0.6176	2.0979	73.3071
CAM5-MAM4	4.4045	1.5427	53.9045	3.7091	0.6123	2.423	84.665
CAM5_MAM3	2.0826	-0.7793	-27.2295	2.6292	0.6619	1.6398	57.3008
CAM5.3-Oslo	1.442	-1.4198	-49.6121	2.6417	0.6056	1.7092	59.7258
ECHAM5.5-HAM2-ELVOC_UH	1.6694	-1.1924	-41.6673	2.4826	0.6632	1.6496	57.6425
ECHAM6-HAM2	1.5579	-1.3039	-45.5628	2.5217	0.6161	1.6744	58.5092
ECHAM6-HAM2-AP	1.2896	-1.5723	-54.9391	2.6788	0.5738	1.7832	62.3096
EMAC	1.0976	-1.7643	-61.6486	2.9093	0.5157	1.9662	68.703
GEOS-Chem-APM	2.2834	-0.5784	-20.2113	1.9974	0.7772	1.2793	44.7013
GEOS-Chem-TOMAS	9.0442	6.1824	216.03	8.1703	0.4142	6.2535	218.513
GISS-E2.1-MATRIX	1.6991	-1.1627	-40.6276	2.2418	0.6827	1.4618	51.0802
TM4-ECPL	3.0843	0.2224	7.7724	2.1015	0.7292	1.4703	51.3768
TM5	0.8833	-1.9785	-69.1352	2.7947	0.5466	2.0003	69.8951
MMM	1.4237	-1.4381	-50.251	2.5798	0.5973	1.7087	59.7066
Observations	2.8618
modeldiversity	3.64643
field=SS_PM1
MODEL	AVER	ME	NMB	RMSE	IOA	MAE	NME
CAM5-Chem-APM	3.879	3.6995	2061.32	5.5718	0.0322	3.7138	2069.24
CAM5-Chem-ATRAS2	0.6008	0.4213	234.761	0.853	0.1015	0.5331	297.042
CAM5-MAM4	1.1722	0.9927	553.135	1.7883	0.0485	1.0803	601.94
CAM5_MAM3	1.7229	1.5435	859.994	2.3487	0.0542	1.5865	883.995
CAM5.3-Oslo	0.5905	0.411	229.018	0.8014	0.1327	0.527	293.633
ECHAM5.5-HAM2-ELVOC_UH	0.167	-0.0125	-6.9386	0.2805	0.2395	0.1826	101.767
ECHAM6-HAM2	0.5369	0.3574	199.129	0.757	0.1042	0.4725	263.288
ECHAM6-HAM2-AP	1.2832	1.1037	614.97	1.8703	0.0526	1.1679	650.729
EMAC	0.8885	0.7091	395.083	1.0985	0.1591	0.7463	415.798
GEOS-Chem-APM	3.4811	3.3016	1839.59	6.6728	0.012	3.3517	1867.5
GEOS-Chem-TOMAS	0.7488	0.5693	317.216	1.1491	0.0883	0.6406	356.924
GISS-E2.1-MATRIX	4.4992	4.3198	2406.89	6.7082	0.021	4.3339	2414.77
TM4-ECPL	3.1134	2.9339	1634.72	4.079	0.0332	2.9446	1640.66
TM5	0.1506	-0.0289	-16.0765	0.223	0.2362	0.1415	78.8411
MMM	0.91	0.7306	407.05	1.2983	0.0708	0.8115	452.147
Observations	0.1795
modeldiversity	4.70151
field=nact03
MODEL	AVER	ME	NMB	RMSE	IOA	MAE	NME
CAM5-Chem-APM	287.746	85.776	42.4696	204.018	0.3162	164.904	81.6478
CAM5-Chem-ATRAS2	352.702	150.732	74.631	200.494	0.366	159.108	78.7779
CAM5-MAM4	280.994	79.0238	39.1265	114.344	0.553	92.0003	45.5514
CAM5_MAM3	282.528	80.5587	39.8864	114.619	0.559	90.0443	44.583
CAM5.3-Oslo	121.207	-80.7624	-39.9873	120.067	0.4563	98.1691	48.6057
ECHAM5.5-HAM2-ELVOC_UH	117.93	-84.0401	-41.6101	118.168	0.4605	94.272	46.6762
ECHAM6-HAM2	182.981	-18.9878	-9.4013	111.802	0.4725	90.5734	44.8449
ECHAM6-HAM2-AP	174.374	-27.5958	-13.6633	114.489	0.403	91.4871	45.2973
EMAC	226.61	24.6391	12.1994	200.772	0.334	146.383	72.4774
GEOS-Chem-APM	406.838	204.869	101.435	252.548	0.3413	209.466	103.711
GEOS-Chem-TOMAS	368.574	166.603	82.489	201.366	0.3991	170.691	84.513
GISS-E2.1-MATRIX	364.668	162.699	80.5559	190.937	0.4413	163.999	81.1994
TM4-ECPL	304.512	102.542	50.7707	157.186	0.4377	109.339	54.1362
TM5	229.47	27.5	13.6159	120.556	0.6393	92.0169	45.5597
MMM	178.678	-23.2918	-11.5323	109.681	0.4422	88.1224	43.6314
Observations	201.97
modeldiversity	1.77058
field=nact06
MODEL	AVER	ME	NMB	RMSE	IOA	MAE	NME
CAM5-Chem-APM	470.449	123.581	35.6277	359.776	0.321	286.392	82.5651
CAM5-Chem-ATRAS2	546.307	199.438	57.4967	288.108	0.4403	223.865	64.5391
CAM5-MAM4	416.27	69.4012	20.008	168.924	0.6241	126.607	36.5001
CAM5_MAM3	420.858	73.9904	21.331	158.688	0.6472	117.974	34.0111
CAM5.3-Oslo	157.429	-189.44	-54.6144	243.46	0.4337	206.34	59.4868
ECHAM5.5-HAM2-ELVOC_UH	160.128	-186.74	-53.8361	239.064	0.4403	198.651	57.27
ECHAM6-HAM2	239.555	-107.313	-30.9378	221.215	0.4487	179.277	51.6846
ECHAM6-HAM2-AP	221.235	-125.633	-36.2193	225.918	0.418	182.175	52.5201
EMAC	288.426	-58.4414	-16.8483	297.32	0.3992	223.253	64.3626
GEOS-Chem-APM	651.841	304.972	87.9218	402.103	0.3764	323.358	93.2224
GEOS-Chem-TOMAS	548.764	201.895	58.2052	275.366	0.4558	219.317	63.2277
GISS-E2.1-MATRIX	643.446	296.577	85.5015	365.562	0.4301	299.893	86.4574
TM4-ECPL	509.962	163.094	47.0191	211.388	0.5205	171.776	49.522
TM5	280.278	-66.5904	-19.1976	186.631	0.6614	153.673	44.3032
MMM	230.396	-116.473	-33.5786	220.467	0.4364	177.971	51.308
Observations	346.868
modeldiversity	2.0525

## Sheet: Hyytiala
field=CCN02
MODEL	AVER	ME	NMB	RMSE	IOA	MAE	NME
CAM5-Chem-APM	230.44	-166.499	-41.9459	481.773	0.3463	327.63	82.5394
CAM5-Chem-ATRAS2	390.112	-6.8254	-1.7195	399.851	0.6413	280.3	70.6156
CAM5-MAM4	214.906	-182.032	-45.8591	334.858	0.6202	220.647	55.5872
CAM5_MAM3	291.94	-104.998	-26.4521	354.298	0.4942	242.73	61.1507
CAM5.3-Oslo	70.2635	-326.674	-82.2986	448.966	0.475	329.843	83.097
ECHAM5.5-HAM2-ELVOC_UH	106.768	-290.17	-73.1022	409.068	0.5216	295.78	74.5155
ECHAM6-HAM2	150.287	-246.651	-62.1385	388.473	0.5296	264.31	66.5873
ECHAM6-HAM2-AP	131.427	-265.51	-66.8896	406.173	0.5005	279.65	70.4518
EMAC	181.808	-215.131	-54.1975	347.696	0.6588	239.794	60.4109
GEOS-Chem-APM	448.935	51.9969	13.0995	397.506	0.6562	265.069	66.7785
GEOS-Chem-TOMAS	295.102	-101.836	-25.6555	300.772	0.6646	190.928	48.1003
GISS-E2.1-MATRIX	429.326	32.3871	8.1592	293.644	0.7246	201.297	50.7124
TM4-ECPL	192.769	-204.169	-51.4359	324.06	0.6596	221.738	55.8623
TM5	185.044	-211.894	-53.3823	360.062	0.5532	237.586	59.8547
MMM	140.858	-256.081	-64.5142	395.759	0.5156	270.211	68.074
Observations	396.938
modeldiversity	3.13438
field=CCN10
MODEL	AVER	ME	NMB	RMSE	IOA	MAE	NME
CAM5-Chem-APM	770.532	-310.369	-28.7139	1133.51	0.3667	818.806	75.7521
CAM5-Chem-ATRAS2	905.26	-175.641	-16.2495	866.695	0.6231	561.114	51.9116
CAM5-MAM4	427.926	-652.976	-60.4102	1023.12	0.491	700.583	64.8147
CAM5_MAM3	682.315	-398.589	-36.8756	1074.6	0.3448	769.742	71.213
CAM5.3-Oslo	264.973	-815.929	-75.4859	1124.12	0.5017	835.874	77.3311
ECHAM5.5-HAM2-ELVOC_UH	194.323	-886.577	-82.022	1180.25	0.4655	889.668	82.3079
ECHAM6-HAM2	245.004	-835.899	-77.3335	1151.38	0.4634	848.069	78.4594
ECHAM6-HAM2-AP	214.211	-866.689	-80.182	1177.83	0.4561	875.914	81.0355
EMAC	232.072	-848.83	-78.5298	1149.54	0.4742	855.761	79.171
GEOS-Chem-APM	901.289	-179.613	-16.6169	900.354	0.6265	593.112	54.872
GEOS-Chem-TOMAS	582.441	-498.463	-46.1154	943.221	0.4794	619.365	57.3007
GISS-E2.1-MATRIX	3143.64	2062.72	190.834	2526.37	0.3444	2118.8	196.021
TM4-ECPL	2280.19	1199.29	110.953	1722.63	0.5	1322	122.306
TM5	272.357	-808.543	-74.8027	1149.2	0.4473	824.749	76.3019
MMM	229.608	-851.295	-78.7578	1163.73	0.46	860.895	79.646
Observations	1080.9
modeldiversity	4.47458
field=N50
MODEL	AVER	ME	NMB	RMSE	IOA	MAE	NME
CAM5-Chem-APM	625.035	-400.496	-39.0525	1009.41	0.4104	767.471	74.8363
CAM5-Chem-ATRAS2	786.861	-238.672	-23.273	708.128	0.7166	508.361	49.5705
CAM5-MAM4	571.034	-454.498	-44.3182	792.673	0.5837	573.202	55.8931
CAM5_MAM3	625.631	-399.9	-38.9944	873.178	0.4821	649.763	63.3586
CAM5.3-Oslo	1800.87	775.347	75.6043	2978.02	0.322	1251.69	122.052
ECHAM5.5-HAM2-ELVOC_UH	244.304	-781.23	-76.178	1014.84	0.4838	787.488	76.7882
ECHAM6-HAM2	249.31	-776.222	-75.6897	997.27	0.5015	786.685	76.7099
ECHAM6-HAM2-AP	203.769	-821.767	-80.1307	1042.19	0.4849	826.984	80.6394
EMAC	619.427	-406.105	-39.5995	746.712	0.6274	534.831	52.1516
GEOS-Chem-APM	739.792	-285.74	-27.8626	696.342	0.6996	504.309	49.1753
GEOS-Chem-TOMAS	833.635	-191.898	-18.7121	801.621	0.5073	574.221	55.9924
GISS-E2.1-MATRIX	3041.46	2015.93	196.574	2405.9	0.3533	2033.48	198.285
TM4-ECPL	1322.09	296.56	28.9176	794.685	0.6259	620.313	60.4869
TM5	308.599	-716.937	-69.9087	969.289	0.4955	735.318	71.701
MMM	226.539	-798.994	-77.9101	1018.4	0.4936	805.588	78.5531
Observations	1025.53
modeldiversity	4.02107
field=N80
MODEL	AVER	ME	NMB	RMSE	IOA	MAE	NME
CAM5-Chem-APM	374.025	-214.668	-36.4651	671.238	0.3724	482.482	81.9581
CAM5-Chem-ATRAS2	578.624	-10.0676	-1.7102	502.701	0.7209	342.558	58.1896
CAM5-MAM4	435.75	-152.942	-25.9799	424.238	0.7001	286.64	48.6909
CAM5_MAM3	470.389	-118.307	-20.0965	510.942	0.5391	367.583	62.4406
CAM5.3-Oslo	671.825	83.1318	14.1214	975.903	0.5508	430.042	73.0502
ECHAM5.5-HAM2-ELVOC_UH	139.24	-449.452	-76.3474	617.804	0.4929	452.785	76.9135
ECHAM6-HAM2	211.516	-377.177	-64.0702	554.653	0.5466	396.116	67.2874
ECHAM6-HAM2-AP	179.992	-408.699	-69.4248	586.604	0.5172	420.906	71.4984
EMAC	347.372	-241.319	-40.9923	450.943	0.678	303.077	51.483
GEOS-Chem-APM	566.63	-22.0608	-3.7474	440.667	0.7509	306.205	52.0144
GEOS-Chem-TOMAS	681.319	92.6272	15.7344	515.237	0.576	367.49	62.4247
GISS-E2.1-MATRIX	1681.14	1092.44	185.571	1328.57	0.4184	1105	187.704
TM4-ECPL	299.377	-289.316	-49.1455	486.182	0.5784	325.825	55.3471
TM5	249.931	-338.762	-57.5447	533.782	0.5586	366.954	62.3336
MMM	195.754	-392.938	-66.7474	568.683	0.5317	406.982	69.133
Observations	588.693
modeldiversity	3.63759
field=N120
MODEL	AVER	ME	NMB	RMSE	IOA	MAE	NME
CAM5-Chem-APM	226.886	-149.785	-39.7655	447.258	0.3532	314.661	83.5376
CAM5-Chem-ATRAS2	336.541	-40.1297	-10.6538	362.397	0.6814	248.281	65.9145
CAM5-MAM4	278.121	-98.5496	-26.1633	264.297	0.7306	171.941	45.6475
CAM5_MAM3	298.584	-78.087	-20.7308	312.596	0.5851	218.125	57.9087
CAM5.3-Oslo	219.231	-157.44	-41.7976	319.761	0.6964	208.657	55.3952
ECHAM5.5-HAM2-ELVOC_UH	70.9199	-305.752	-81.1721	415.299	0.4824	306.524	81.3772
ECHAM6-HAM2	153.273	-223.399	-59.3088	352.194	0.5541	241.353	64.0753
ECHAM6-HAM2-AP	137.321	-239.351	-63.5437	370.934	0.517	253.418	67.2785
EMAC	196.204	-180.468	-47.9113	315.738	0.6548	213.655	56.722
GEOS-Chem-APM	380.863	4.1923	1.113	294.807	0.7561	198.838	52.7884
GEOS-Chem-TOMAS	537.667	160.996	42.7419	358.68	0.641	264.26	70.1567
GISS-E2.1-MATRIX	695.606	318.934	84.6718	478.696	0.5926	366.643	97.3377
TM4-ECPL	110.563	-266.107	-70.6472	368.797	0.5443	267.643	71.0549
TM5	199.298	-177.374	-47.09	313.285	0.6316	205.383	54.5258
MMM	145.297	-231.375	-61.4263	359.624	0.5349	245.945	65.2945
Observations	376.671
modeldiversity	3.14729
field=SO4_PM1
MODEL	AVER	ME	NMB	RMSE	IOA	MAE	NME
CAM5-Chem-APM	0.7355	0.1298	21.4358	1.2591	0.1976	0.7225	119.287
CAM5-Chem-ATRAS2	0.7999	0.1943	32.0766	1.1721	0.3991	0.6579	108.621
CAM5-MAM4	1.0374	0.4317	71.2833	1.3189	0.3164	0.7875	130.014
CAM5_MAM3	1.1036	0.4979	82.2147	1.159	0.4482	0.6925	114.334
CAM5.3-Oslo	1.6451	1.0394	171.619	2.1172	0.2083	1.3641	225.224
ECHAM5.5-HAM2-ELVOC_UH	0.8946	0.2889	47.6967	1.1748	0.4351	0.6253	103.247
ECHAM6-HAM2	1.0333	0.4276	70.6002	1.1371	0.5304	0.6664	110.022
ECHAM6-HAM2-AP	0.7517	0.1461	24.1165	0.7082	0.6109	0.459	75.7804
EMAC	0.781	0.1753	28.9436	0.937	0.4451	0.5623	92.8388
GEOS-Chem-APM	0.6954	0.0898	14.8216	0.6506	0.477	0.4397	72.6009
GEOS-Chem-TOMAS	0.7066	0.101	16.6682	0.6412	0.4664	0.4378	72.2915
GISS-E2.1-MATRIX	0.8693	0.2636	43.5284	0.7174	0.5843	0.492	81.2356
TM4-ECPL	0.6789	0.0732	12.0877	0.5992	0.7334	0.3716	61.3604
TM5	0.2614	-0.3442	-56.8344	0.6307	0.4664	0.3787	62.5281
MMM	0.8925	0.2868	47.3582	0.8446	0.6093	0.5367	88.6132
Observations	0.6057
modeldiversity	2.92021
field=BC_PM1
MODEL	AVER	ME	NMB	RMSE	IOA	MAE	NME
CAM5-Chem-APM	0.1515	0.0304	25.1026	0.1956	0.26	0.1291	106.609
CAM5-Chem-ATRAS2	0.1745	0.0534	44.0696	0.1725	0.5624	0.1084	89.4918
CAM5-MAM4	0.1201	-0.001	-0.827	0.1016	0.739	0.0626	51.6995
CAM5_MAM3	0.1273	0.0062	5.0867	0.1233	0.6477	0.0762	62.942
CAM5.3-Oslo	0.1402	0.0191	15.751	0.1169	0.6462	0.0734	60.5564
ECHAM5.5-HAM2-ELVOC_UH	0.1477	0.0266	21.9638	0.1172	0.7247	0.0717	59.1854
ECHAM6-HAM2	0.2094	0.0883	72.8832	0.189	0.6084	0.1173	96.8162
ECHAM6-HAM2-AP	0.1433	0.0222	18.2987	0.1467	0.5883	0.087	71.8034
EMAC	0.0906	-0.0305	-25.204	0.1	0.66	0.0585	48.3324
GEOS-Chem-APM	0.1348	0.0136	11.2606	0.0972	0.7906	0.0626	51.6633
GEOS-Chem-TOMAS	0.1893	0.0682	56.2911	0.1344	0.7059	0.092	75.9826
GISS-E2.1-MATRIX	0.1705	0.0494	40.7591	0.1259	0.6918	0.0838	69.1798
TM4-ECPL	0.2556	0.1345	111.009	0.1859	0.6358	0.1419	117.162
TM5	0.1666	0.0454	37.5032	0.1058	0.7877	0.0733	60.514
MMM	0.1764	0.0552	45.591	0.1538	0.6413	0.0933	77.0395
Observations	0.1211
modeldiversity	2.09017
field=ORG_PM1
MODEL	AVER	ME	NMB	RMSE	IOA	MAE	NME
CAM5-Chem-APM	1.8146	-0.2954	-14.0005	2.5304	0.4011	1.7297	81.9774
CAM5-Chem-ATRAS2	1.3911	-0.7189	-34.0725	2.1209	0.6831	1.3745	65.1424
CAM5-MAM4	2.0836	-0.0264	-1.2522	1.7165	0.7677	1.1375	53.9098
CAM5_MAM3	2.1959	0.0859	4.0698	2.0906	0.6343	1.4214	67.365
CAM5.3-Oslo	1.4062	-0.7038	-33.3556	1.7159	0.8018	1.1269	53.4095
ECHAM5.5-HAM2-ELVOC_UH	0.8849	-1.2251	-58.0602	1.9523	0.6267	1.3507	64.0152
ECHAM6-HAM2	1.6553	-0.4547	-21.5477	1.9787	0.6138	1.2723	60.3002
ECHAM6-HAM2-AP	1.4247	-0.6853	-32.4774	2.0445	0.6132	1.3542	64.1794
EMAC	0.8854	-1.2246	-58.0393	2.0346	0.5679	1.3624	64.568
GEOS-Chem-APM	2.0679	-0.0421	-1.9937	1.5318	0.8206	0.9272	43.9411
GEOS-Chem-TOMAS	3.6188	1.5088	71.5093	3.0994	0.4342	2.1873	103.665
GISS-E2.1-MATRIX	1.9579	-0.1521	-7.2065	1.7642	0.6054	1.1733	55.6083
TM4-ECPL	1.3413	-0.7687	-36.4317	1.8538	0.5612	1.1727	55.579
TM5	0.524	-1.586	-75.166	2.4161	0.4346	1.6085	76.2341
MMM	1.54	-0.57	-27.0126	1.9954	0.6163	1.2879	61.0369
Observations	2.11
modeldiversity	3.25657
field=SS_PM1
MODEL	AVER	ME	NMB	RMSE	IOA	MAE	NME
CAM5-Chem-APM	0.7834	0.764	3921.16	1.4177	0.0129	0.7665	3934.39
CAM5-Chem-ATRAS2	0.1189	0.0994	510.357	0.2056	0.0949	0.1076	552.094
CAM5-MAM4	0.1811	0.1616	829.403	0.3404	0.054	0.169	867.46
CAM5_MAM3	0.423	0.4035	2071.21	0.6809	0.0336	0.4052	2079.85
CAM5.3-Oslo	0.1409	0.1214	623.335	0.2395	0.0906	0.1301	667.933
ECHAM5.5-HAM2-ELVOC_UH	0.0462	0.0267	137.293	0.0731	0.2178	0.0404	207.285
ECHAM6-HAM2	0.094	0.0745	382.594	0.1691	0.1078	0.085	436.45
ECHAM6-HAM2-AP	0.2675	0.248	1273.1	0.4882	0.0432	0.2521	1293.9
EMAC	0.416	0.3965	2035.33	0.5186	0.0422	0.397	2037.9
GEOS-Chem-APM	0.3513	0.3318	1703.09	0.9145	0.0154	0.3394	1741.85
GEOS-Chem-TOMAS	0.2593	0.2398	1230.69	0.4822	0.0343	0.2435	1249.63
GISS-E2.1-MATRIX	1.8512	1.8317	9401.53	2.9166	0.0085	1.8321	9403.63
TM4-ECPL	0.9693	0.9498	4875.04	1.359	0.0178	0.9503	4877.54
TM5	0.1141	0.0946	485.67	0.1192	0.1536	0.0975	500.537
MMM	0.1808	0.1613	827.846	0.3251	0.0627	0.167	857.084
Observations	0.0195
modeldiversity	5.52862

## Sheet: Jungfraujoch
field=nact03
MODEL	AVER	ME	NMB	RMSE	IOA	MAE	NME
CAM5-Chem-APM	117.632	-27.4397	-18.9146	172.28	0.34	100.24	69.0966
CAM5-Chem-ATRAS2	102.039	-43.0326	-29.663	150.46	0.4055	82.0453	56.555
CAM5-MAM4	17.6172	-127.454	-87.8562	249.04	0.2542	136.744	94.26
CAM5_MAM3	71.6267	-73.4451	-50.6267	146.569	0.3835	94.0831	64.8528
CAM5.3-Oslo	33.2165	-111.855	-77.1034	160.945	0.442	115.754	79.7909
ECHAM5.5-HAM2-ELVOC_UH	64.1774	-80.8942	-55.7615	159.761	0.4328	92.8418	63.9972
ECHAM6-HAM2	-167.03	-312.101	-215.136	547.273	0.1484	324.758	223.861
ECHAM6-HAM2-AP	-175.77	-320.842	-221.161	546.244	0.1489	327.696	225.885
EMAC	-459.533	-604.604	-416.762	816.855	0.1256	623.887	430.054
GEOS-Chem-APM	117.335	-27.7367	-19.1193	98.9701	0.6938	70.0654	48.2971
GEOS-Chem-TOMAS	100.374	-44.6977	-30.8107	141.655	0.4047	81.0745	55.8858
GISS-E2.1-MATRIX	124.118	-20.9535	-14.4436	163.539	0.3041	89.7771	61.8847
TM4-ECPL	83.0629	-62.0085	-42.7434	98.4772	0.6362	74.4	51.285
TM5	-2.339	-147.411	-101.612	296.51	0.2382	153.971	106.135
MMM	-171.4	-316.471	-218.148	522.485	0.16	325.046	224.059
Observations	145.072
modeldiversity	-7.73965
field=nact06
MODEL	AVER	ME	NMB	RMSE	IOA	MAE	NME
CAM5-Chem-APM	184.506	-15.6232	-7.8066	221.542	0.3847	146.945	73.4252
CAM5-Chem-ATRAS2	151.858	-48.2704	-24.1197	186.902	0.4875	116.66	58.2923
CAM5-MAM4	39.6949	-160.434	-80.1653	290.753	0.3332	177.037	88.4618
CAM5_MAM3	92.0225	-108.106	-54.0184	201.479	0.4262	135.824	67.8682
CAM5.3-Oslo	44.2033	-155.926	-77.9127	217.597	0.4894	161.341	80.6187
ECHAM5.5-HAM2-ELVOC_UH	103.697	-96.4319	-48.1849	197.673	0.5019	124.372	62.1461
ECHAM6-HAM2	-154.127	-354.256	-177.014	583.552	0.215	369.34	184.551
ECHAM6-HAM2-AP	-164.372	-364.501	-182.133	583.694	0.2147	373.471	186.615
EMAC	-454.466	-654.593	-327.086	862.57	0.1797	673.557	336.562
GEOS-Chem-APM	156.181	-43.9469	-21.9593	139.166	0.7147	100.939	50.4372
GEOS-Chem-TOMAS	126.786	-73.3434	-36.6481	190.773	0.4341	123.244	61.5822
GISS-E2.1-MATRIX	199.143	-0.9857	-0.4925	211.475	0.3797	139.372	69.6413
TM4-ECPL	129.124	-71.0049	-35.4796	139.488	0.6617	101.449	50.6916
TM5	6.8041	-193.325	-96.6001	337.278	0.3251	201.101	100.486
MMM	-159.249	-359.378	-179.573	560.408	0.2281	369.968	184.865
Observations	200.129
modeldiversity	31.2992
field=CCN02
MODEL	AVER	ME	NMB	RMSE	IOA	MAE	NME
CAM5-Chem-APM	91.5937	-125.024	-57.7161	307.197	0.4333	177.99	82.1676
CAM5-Chem-ATRAS2	65.8866	-150.731	-69.5836	286.216	0.5408	169	78.0174
CAM5-MAM4	24.5774	-192.04	-88.6536	337.897	0.3976	197.551	91.1976
CAM5_MAM3	56.2638	-160.353	-74.0258	317.196	0.4002	179.048	82.6561
CAM5.3-Oslo	27.0254	-189.592	-87.5236	326.235	0.4226	193.536	89.3445
ECHAM5.5-HAM2-ELVOC_UH	43.6553	-172.963	-79.8468	298.91	0.4998	178.145	82.239
ECHAM6-HAM2	47.9625	-168.655	-77.8583	307.884	0.461	181.25	83.6726
ECHAM6-HAM2-AP	36.7589	-179.858	-83.03	315.364	0.4437	186.329	86.0171
EMAC	43.747	-172.87	-79.8041	328.191	0.4195	194.696	89.8797
GEOS-Chem-APM	117.255	-99.362	-45.8696	247.862	0.6494	143.321	66.1628
GEOS-Chem-TOMAS	92.3705	-124.247	-57.3576	293.293	0.4137	159.243	73.5133
GISS-E2.1-MATRIX	75.2669	-141.351	-65.2536	289.888	0.4642	162.068	74.8174
TM4-ECPL	57.0606	-159.557	-73.6581	289.379	0.4964	164.874	76.1126
TM5	50.1226	-166.495	-76.8609	317.538	0.4034	175.78	81.1475
MMM	42.3607	-174.256	-80.4439	310.978	0.4514	182.932	84.4492
Observations	216.618
modeldiversity	3.8234
field=CCN07
MODEL	AVER	ME	NMB	RMSE	IOA	MAE	NME
CAM5-Chem-APM	313.8	-165.156	-34.4824	568.461	0.4108	366.514	76.5234
CAM5-Chem-ATRAS2	211.078	-267.879	-55.9297	522.511	0.4946	319.827	66.7758
CAM5-MAM4	77.4878	-401.468	-83.8212	628.944	0.4271	409.983	85.5991
CAM5_MAM3	110.685	-368.271	-76.8903	604.93	0.4301	387.538	80.9128
CAM5.3-Oslo	61.783	-417.174	-87.1005	618.862	0.4568	421.348	87.972
ECHAM5.5-HAM2-ELVOC_UH	172.944	-306.012	-63.8914	538.827	0.5208	345.86	72.2111
ECHAM6-HAM2	81.3288	-397.629	-83.0197	609.523	0.4534	407.159	85.0095
ECHAM6-HAM2-AP	64.8318	-414.125	-86.4639	622.68	0.4466	419.877	87.6648
EMAC	66.9609	-411.996	-86.0195	636.519	0.4349	428.358	89.4356
GEOS-Chem-APM	229.838	-249.119	-52.0127	474.159	0.62	303.486	63.3639
GEOS-Chem-TOMAS	171.436	-307.52	-64.2062	569.736	0.4386	351.128	73.311
GISS-E2.1-MATRIX	370.092	-108.865	-22.7296	504.793	0.4916	330.61	69.0271
TM4-ECPL	240.845	-238.113	-49.7148	458.15	0.6452	284.519	59.4038
TM5	70.136	-408.82	-85.3563	630.324	0.4305	412.501	86.1248
MMM	73.0804	-405.877	-84.7418	615.262	0.4504	412.553	86.1358
Observations	478.957
modeldiversity	3.80942
field=CCN10
MODEL	AVER	ME	NMB	RMSE	IOA	MAE	NME
CAM5-Chem-APM	403.519	-149.38	-27.0175	645.828	0.3942	419.879	75.9413
CAM5-Chem-ATRAS2	254.357	-298.542	-53.9957	586.61	0.4803	360.456	65.1938
CAM5-MAM4	109.707	-443.193	-80.158	693.803	0.4291	454.691	82.2376
CAM5_MAM3	126.877	-426.021	-77.0522	680.449	0.432	443.388	80.1932
CAM5.3-Oslo	79.5732	-473.326	-85.6079	689.032	0.4656	478.483	86.5408
ECHAM5.5-HAM2-ELVOC_UH	289.671	-263.227	-47.6085	578.279	0.5542	371.746	67.2358
ECHAM6-HAM2	95.7647	-457.135	-82.6796	686.369	0.4542	466.841	84.4351
ECHAM6-HAM2-AP	79.813	-473.087	-85.5647	698.443	0.4485	479.481	86.7212
EMAC	70.4581	-482.442	-87.2568	722.158	0.4344	497.142	89.9155
GEOS-Chem-APM	279.844	-273.055	-49.386	539.464	0.6039	347.329	62.8196
GEOS-Chem-TOMAS	234.936	-317.963	-57.5084	643.314	0.4265	391.036	70.7246
GISS-E2.1-MATRIX	518.558	-34.3405	-6.211	603.115	0.4391	416	75.2397
TM4-ECPL	316.854	-236.044	-42.692	496.335	0.669	311.541	56.3467
TM5	82.5413	-470.358	-85.0711	708.572	0.4323	473.433	85.6273
MMM	87.7889	-465.11	-84.1219	691.283	0.4519	471.891	85.3484
Observations	552.899
modeldiversity	3.92427
field=SO4_PM1
MODEL	AVER	ME	NMB	RMSE	IOA	MAE	NME
CAM5-Chem-APM	0.4791	0.105	28.0648	0.6958	0.3993	0.4273	114.214
CAM5-Chem-ATRAS2	0.4613	0.0872	23.2988	0.7537	0.6507	0.3769	100.724
CAM5-MAM4	0.2063	-0.1678	-44.8511	0.5183	0.5037	0.3081	82.3392
CAM5_MAM3	0.4359	0.0618	16.5101	0.6536	0.4492	0.3582	95.729
CAM5.3-Oslo	0.9455	0.5713	152.704	1.1745	0.4886	0.6887	184.082
ECHAM5.5-HAM2-ELVOC_UH	0.7924	0.4183	111.793	1.5888	0.368	0.613	163.838
ECHAM6-HAM2	0.7545	0.3804	101.67	1.0813	0.5109	0.5762	154.004
ECHAM6-HAM2-AP	0.6374	0.2632	70.3553	0.8286	0.5917	0.4657	124.469
EMAC	0.3431	-0.031	-8.2855	0.5202	0.6266	0.2797	74.7437
GEOS-Chem-APM	0.3175	-0.0566	-15.1333	0.396	0.725	0.2404	64.2574
GEOS-Chem-TOMAS	0.3446	-0.0295	-7.8896	0.431	0.6133	0.2523	67.4339
GISS-E2.1-MATRIX	0.3854	0.0112	2.9969	0.488	0.5973	0.2716	72.6028
TM4-ECPL	0.5303	0.1562	41.7386	0.5769	0.6983	0.3328	88.9472
TM5	0.1473	-0.2268	-60.6313	0.487	0.402	0.2717	72.6134
MMM	0.696	0.3218	86.0126	0.9372	0.5574	0.5155	137.775
Observations	0.3741
modeldiversity	3.20052
field=BC_PM1
MODEL	AVER	ME	NMB	RMSE	IOA	MAE	NME
CAM5-Chem-APM	0.0309	-0.027	-46.6069	0.0935	0.3845	0.0543	93.895
CAM5-Chem-ATRAS2	0.0269	-0.0309	-53.4647	0.0948	0.3733	0.0534	92.2955
CAM5-MAM4	0.0122	-0.0457	-78.994	0.0933	0.3456	0.0505	87.217
CAM5_MAM3	0.0156	-0.0423	-73.0497	0.0926	0.3457	0.0502	86.6918
CAM5.3-Oslo	0.0392	-0.0187	-32.2826	0.0919	0.3321	0.0521	89.9573
ECHAM5.5-HAM2-ELVOC_UH	0.0343	-0.0235	-40.6762	0.0964	0.3578	0.0557	96.1765
ECHAM6-HAM2	0.048	-0.0099	-17.0243	0.0937	0.3557	0.0539	93.1656
ECHAM6-HAM2-AP	0.0283	-0.0296	-51.1722	0.0947	0.3653	0.0539	93.0992
EMAC	0.005	-0.0529	-91.3981	0.0966	0.3558	0.0538	92.9645
GEOS-Chem-APM	0.0239	-0.034	-58.734	0.0903	0.3423	0.0489	84.4401
GEOS-Chem-TOMAS	0.0144	-0.0434	-75.0343	0.0914	0.3431	0.0478	82.6694
GISS-E2.1-MATRIX	0.0195	-0.0384	-66.3382	0.0908	0.3516	0.0494	85.2825
TM4-ECPL	0.0481	-0.0098	-16.8528	0.0865	0.3481	0.0495	85.4744
TM5	0.0296	-0.0282	-48.7801	0.0864	0.2916	0.0445	76.8534
MMM	0.0381	-0.0197	-34.0983	0.0925	0.356	0.0521	90.019
Observations	0.0579
modeldiversity	3.50862
field=ORG_PM1
MODEL	AVER	ME	NMB	RMSE	IOA	MAE	NME
CAM5-Chem-APM	0.5056	-0.3709	-42.3199	1.4903	0.4128	0.7768	88.6309
CAM5-Chem-ATRAS2	0.3908	-0.4857	-55.4132	1.3967	0.5058	0.6982	79.656
CAM5-MAM4	0.1699	-0.7066	-80.6138	1.4618	0.3687	0.7368	84.0604
CAM5_MAM3	0.292	-0.5844	-66.6802	1.3627	0.4204	0.658	75.071
CAM5.3-Oslo	0.4726	-0.4039	-46.0795	1.2946	0.5099	0.5989	68.3285
ECHAM5.5-HAM2-ELVOC_UH	0.3375	-0.539	-61.4933	1.3458	0.4735	0.6498	74.1321
ECHAM6-HAM2	0.2287	-0.6478	-73.9079	1.4146	0.3932	0.6776	77.3068
ECHAM6-HAM2-AP	0.1762	-0.7002	-79.892	1.4436	0.3946	0.7205	82.205
EMAC	0.0232	-0.8533	-97.3486	1.5691	0.3659	0.8533	97.3489
GEOS-Chem-APM	0.4488	-0.4276	-48.791	1.3529	0.4802	0.6296	71.833
GEOS-Chem-TOMAS	0.1769	-0.6996	-79.8171	1.4861	0.3506	0.7305	83.3415
GISS-E2.1-MATRIX	0.2262	-0.6503	-74.1932	1.3528	0.4403	0.6712	76.5769
TM4-ECPL	0.2444	-0.6321	-72.1184	1.4107	0.3803	0.6607	75.3851
TM5	0.1657	-0.7108	-81.0955	1.44	0.3791	0.7231	82.5019
MMM	0.2025	-0.674	-76.9002	1.4281	0.3939	0.6972	79.5479
Observations	0.8765
modeldiversity	3.69021
field=nact03
MODEL	AVER	ME	NMB	RMSE	IOA	MAE	NME
CAM5-Chem-APM	117.632	-27.4397	-18.9146	172.28	0.34	100.24	69.0966
CAM5-Chem-ATRAS2	102.039	-43.0326	-29.663	150.46	0.4055	82.0453	56.555
CAM5-MAM4	17.6172	-127.454	-87.8562	249.04	0.2542	136.744	94.26
CAM5_MAM3	71.6267	-73.4451	-50.6267	146.569	0.3835	94.0831	64.8528
CAM5.3-Oslo	33.2165	-111.855	-77.1034	160.945	0.442	115.754	79.7909
ECHAM5.5-HAM2-ELVOC_UH	64.1774	-80.8942	-55.7615	159.761	0.4328	92.8418	63.9972
ECHAM6-HAM2	-167.03	-312.101	-215.136	547.273	0.1484	324.758	223.861
ECHAM6-HAM2-AP	-175.77	-320.842	-221.161	546.244	0.1489	327.696	225.885
EMAC	-459.533	-604.604	-416.762	816.855	0.1256	623.887	430.054
GEOS-Chem-APM	117.335	-27.7367	-19.1193	98.9701	0.6938	70.0654	48.2971
GEOS-Chem-TOMAS	100.374	-44.6977	-30.8107	141.655	0.4047	81.0745	55.8858
GISS-E2.1-MATRIX	124.118	-20.9535	-14.4436	163.539	0.3041	89.7771	61.8847
TM4-ECPL	83.0629	-62.0085	-42.7434	98.4772	0.6362	74.4	51.285
TM5	-2.339	-147.411	-101.612	296.51	0.2382	153.971	106.135
MMM	-171.4	-316.471	-218.148	522.485	0.16	325.046	224.059
Observations	145.072
modeldiversity	-7.73965
field=nact06
MODEL	AVER	ME	NMB	RMSE	IOA	MAE	NME
CAM5-Chem-APM	184.506	-15.6232	-7.8066	221.542	0.3847	146.945	73.4252
CAM5-Chem-ATRAS2	151.858	-48.2704	-24.1197	186.902	0.4875	116.66	58.2923
CAM5-MAM4	39.6949	-160.434	-80.1653	290.753	0.3332	177.037	88.4618
CAM5_MAM3	92.0225	-108.106	-54.0184	201.479	0.4262	135.824	67.8682
CAM5.3-Oslo	44.2033	-155.926	-77.9127	217.597	0.4894	161.341	80.6187
ECHAM5.5-HAM2-ELVOC_UH	103.697	-96.4319	-48.1849	197.673	0.5019	124.372	62.1461
ECHAM6-HAM2	-154.127	-354.256	-177.014	583.552	0.215	369.34	184.551
ECHAM6-HAM2-AP	-164.372	-364.501	-182.133	583.694	0.2147	373.471	186.615
EMAC	-454.466	-654.593	-327.086	862.57	0.1797	673.557	336.562
GEOS-Chem-APM	156.181	-43.9469	-21.9593	139.166	0.7147	100.939	50.4372
GEOS-Chem-TOMAS	126.786	-73.3434	-36.6481	190.773	0.4341	123.244	61.5822
GISS-E2.1-MATRIX	199.143	-0.9857	-0.4925	211.475	0.3797	139.372	69.6413
TM4-ECPL	129.124	-71.0049	-35.4796	139.488	0.6617	101.449	50.6916
TM5	6.8041	-193.325	-96.6001	337.278	0.3251	201.101	100.486
MMM	-159.249	-359.378	-179.573	560.408	0.2281	369.968	184.865
Observations	200.129
modeldiversity	31.2992

## Sheet: MaceHead
field=nact03
MODEL	AVER	ME	NMB	RMSE	IOA	MAE	NME
CAM5-Chem-APM	139.783	14.4387	11.5192	143.524	0.2959	105.144	83.8842
CAM5-Chem-ATRAS2	185.425	60.08	47.9319	107.313	0.6426	78.2508	62.4286
CAM5-MAM4	133.102	7.7574	6.1888	64.588	0.7545	49.6671	39.6245
CAM5_MAM3	85.4758	-39.8685	-31.8072	64.2733	0.7368	48.9434	39.0471
CAM5.3-Oslo	47.7973	-77.5471	-61.8672	98.1752	0.5569	80.6468	64.3401
ECHAM5.5-HAM2-ELVOC_UH	45.7965	-79.5479	-63.4634	96.9434	0.5968	81.1307	64.7262
ECHAM6-HAM2	192.86	67.5155	53.8639	146.57	0.3452	112.853	90.0347
ECHAM6-HAM2-AP	80.5444	-44.8001	-35.7416	102.582	0.5528	81.7	65.1804
EMAC	62.2743	-63.0701	-50.3174	117.364	0.619	90.1624	71.9317
GEOS-Chem-APM	117.871	-7.4733	-5.9622	93.1874	0.7594	69.7926	55.6806
GEOS-Chem-TOMAS	84.549	-40.7955	-32.5467	74.3071	0.753	58.0227	46.2906
GISS-E2.1-MATRIX	201.926	76.5812	61.0966	144.704	0.4684	100.525	80.1989
TM4-ECPL	88.5518	-36.7927	-29.3532	71.0827	0.7063	54.5329	43.5064
TM5	62.3296	-63.0149	-50.2734	87.8008	0.7072	73.8359	58.9064
MMM	136.702	11.3576	9.0611	90.3412	0.5177	70.5203	56.2612
Observations	125.344
modeldiversity	2.90929
field=nact06
MODEL	AVER	ME	NMB	RMSE	IOA	MAE	NME
CAM5-Chem-APM	197.254	6.697	3.5144	226.048	0.332	159.382	83.6405
CAM5-Chem-ATRAS2	270.532	79.9751	41.9692	157.241	0.7104	115.152	60.4294
CAM5-MAM4	181.547	-9.0099	-4.7282	107.888	0.771	81.1202	42.5702
CAM5_MAM3	109.468	-81.0887	-42.5536	124.868	0.6911	90.2296	47.3506
CAM5.3-Oslo	56.5874	-133.969	-70.3043	175.252	0.5269	136.984	71.8866
ECHAM5.5-HAM2-ELVOC_UH	66.5916	-123.965	-65.0543	161.382	0.6058	125.78	66.0066
ECHAM6-HAM2	248.748	58.1918	30.5378	222.797	0.3576	170.043	89.2351
ECHAM6-HAM2-AP	82.7828	-107.774	-56.5577	170.368	0.5665	132.283	69.4193
EMAC	74.8966	-115.66	-60.696	167.024	0.6734	128.649	67.5124
GEOS-Chem-APM	159.65	-30.9068	-16.2193	143.728	0.812	103.156	54.1339
GEOS-Chem-TOMAS	98.7915	-91.7654	-48.1566	133.015	0.7259	102.397	53.7357
GISS-E2.1-MATRIX	322.828	132.271	69.4131	215.201	0.5837	167.175	87.7298
TM4-ECPL	149.288	-41.2686	-21.6569	115.102	0.7124	83.7891	43.9707
TM5	75.8311	-114.726	-60.2055	147.985	0.7075	118.625	62.2518
MMM	165.766	-24.7912	-13.0099	154.049	0.4997	117.096	61.4493
Observations	190.556
modeldiversity	3.19403
field=CCN02
MODEL	AVER	ME	NMB	RMSE	IOA	MAE	NME
CAM5-Chem-APM	207.019	-57.2362	-21.6594	466.606	0.1969	286.202	108.305
CAM5-Chem-ATRAS2	275.29	11.0349	4.1758	281.223	0.7668	178.861	67.6851
CAM5-MAM4	163.2	-101.055	-38.2415	262.306	0.6357	147.073	55.6558
CAM5_MAM3	99.9726	-164.282	-62.1682	305.663	0.5041	172.052	65.1083
CAM5.3-Oslo	65.318	-198.937	-75.2823	341.151	0.4364	202.573	76.6582
ECHAM5.5-HAM2-ELVOC_UH	67.0931	-197.162	-74.6106	306.047	0.598	198.372	75.0683
ECHAM6-HAM2	295.015	30.7601	11.6403	390.433	0.3078	255.177	96.5648
ECHAM6-HAM2-AP	126.916	-137.34	-51.9723	309.277	0.5263	179.997	68.1148
EMAC	96.063	-168.192	-63.6477	283.255	0.6902	180.18	68.184
GEOS-Chem-APM	206.039	-58.2158	-22.0302	218.973	0.889	142.539	53.94
GEOS-Chem-TOMAS	138.067	-126.188	-47.7522	266.135	0.6408	147.605	55.857
GISS-E2.1-MATRIX	256.422	-7.8335	-2.9644	228.932	0.7891	149.19	56.457
TM4-ECPL	87.0025	-177.253	-67.0763	297.432	0.5857	178.854	67.6823
TM5	88.6529	-175.603	-66.4519	270.604	0.7082	176.719	66.8744
MMM	210.965	-53.2897	-20.166	315.602	0.416	190.578	72.1189
Observations	264.255
modeldiversity	3.42487
field=CCN10
MODEL	AVER	ME	NMB	RMSE	IOA	MAE	NME
CAM5-Chem-APM	552.281	-261.161	-32.1057	1508.19	0.2681	795.1	97.7453
CAM5-Chem-ATRAS2	569.918	-243.525	-29.9376	1172.19	0.461	508.304	62.4881
CAM5-MAM4	378.648	-434.793	-53.4511	1236.55	0.407	543.948	66.87
CAM5_MAM3	185.164	-628.278	-77.237	1364.76	0.338	637.185	78.3321
CAM5.3-Oslo	96.4193	-717.024	-88.147	1444	0.332	719.101	88.4024
ECHAM5.5-HAM2-ELVOC_UH	198.144	-615.298	-75.6413	1350.53	0.3557	636.707	78.2733
ECHAM6-HAM2	434.201	-379.241	-46.6218	1400	0.2328	680.326	83.6355
ECHAM6-HAM2-AP	145.559	-667.883	-82.1059	1405.03	0.3485	682.385	83.8887
EMAC	147.649	-665.793	-81.8489	1342.19	0.393	669.976	82.3632
GEOS-Chem-APM	338.906	-474.535	-58.3368	1108.69	0.6278	519.876	63.9108
GEOS-Chem-TOMAS	175.9	-637.543	-78.3761	1358.56	0.3474	644.365	79.2147
GISS-E2.1-MATRIX	1301.69	488.248	60.0225	1238.43	0.6794	835.155	102.669
TM4-ECPL	613.034	-200.408	-24.6371	993.134	0.7207	441.299	54.2509
TM5	128.674	-684.769	-84.1818	1350.01	0.3883	685.995	84.3326
MMM	289.88	-523.562	-64.3638	1381.9	0.2869	637.608	78.3841
Observations	813.441
modeldiversity	4.16043
field=N50
MODEL	AVER	ME	NMB	RMSE	IOA	MAE	NME
CAM5-Chem-APM	374.005	-289.001	-43.5896	1094.92	0.3602	653.334	98.5415
CAM5-Chem-ATRAS2	497.253	-165.754	-25.0005	756.349	0.6456	412.097	62.1561
CAM5-MAM4	479.261	-183.744	-27.7139	776.02	0.5811	426.674	64.3546
CAM5_MAM3	150.579	-512.427	-77.2887	976.203	0.4114	519.579	78.3674
CAM5.3-Oslo	859.956	196.952	29.706	1018.54	0.6704	654.217	98.6747
ECHAM5.5-HAM2-ELVOC_UH	104.419	-558.588	-84.2511	1002.91	0.4194	561.183	84.6425
ECHAM6-HAM2	406.596	-256.41	-38.674	993.893	0.3074	562.373	84.8219
ECHAM6-HAM2-AP	145.615	-517.392	-78.0375	1009.88	0.3906	542.991	81.8986
EMAC	337.091	-325.914	-49.1571	760.867	0.6535	410.049	61.8472
GEOS-Chem-APM	303.229	-359.776	-54.2645	775.722	0.6966	439.104	66.2295
GEOS-Chem-TOMAS	253.901	-409.104	-61.7047	871.967	0.5135	461.532	69.6122
GISS-E2.1-MATRIX	931.285	268.277	40.4639	760.051	0.7357	565.769	85.3341
TM4-ECPL	336.427	-326.579	-49.2574	752.086	0.6463	389.436	58.738
TM5	109.838	-553.168	-83.4336	979.37	0.4402	554.377	83.6159
MMM	276.106	-386.898	-58.3554	977.901	0.3431	512.67	77.3253
Observations	663.004
modeldiversity	3.66148
field=N80
MODEL	AVER	ME	NMB	RMSE	IOA	MAE	NME
CAM5-Chem-APM	259.392	-193.882	-42.7738	775.974	0.3614	444.343	98.0299
CAM5-Chem-ATRAS2	364.826	-88.4473	-19.513	516.338	0.7167	290.704	64.1344
CAM5-MAM4	338.436	-114.838	-25.3353	535.28	0.6086	290.588	64.109
CAM5_MAM3	112.041	-341.233	-75.282	671.571	0.415	346.909	76.5344
CAM5.3-Oslo	305.024	-148.249	-32.7064	588.145	0.5738	324.048	71.4907
ECHAM5.5-HAM2-ELVOC_UH	57.1389	-396.135	-87.3944	712.61	0.4087	397.052	87.5967
ECHAM6-HAM2	321.212	-132.063	-29.1354	700.191	0.3039	400.176	88.286
ECHAM6-HAM2-AP	133.922	-319.352	-70.4548	686.239	0.388	356.618	78.6762
EMAC	194.395	-258.877	-57.1129	558.077	0.6225	298.558	65.8673
GEOS-Chem-APM	242.596	-210.678	-46.4792	517.48	0.7422	282.702	62.3692
GEOS-Chem-TOMAS	201.309	-251.965	-55.5879	585.211	0.5593	300.542	66.3049
GISS-E2.1-MATRIX	520.867	67.5929	14.9122	493.32	0.737	329.145	72.6153
TM4-ECPL	100.574	-352.699	-77.8118	668.448	0.4357	356.255	78.5961
TM5	86.2903	-366.984	-80.9632	666.893	0.4608	367.9	81.1653
MMM	227.566	-225.707	-49.7949	671.27	0.3334	349.789	77.1696
Observations	453.273
modeldiversity	3.45728
field=N120
MODEL	AVER	ME	NMB	RMSE	IOA	MAE	NME
CAM5-Chem-APM	187.025	-104.222	-35.7846	500.969	0.3337	288.588	99.0866
CAM5-Chem-ATRAS2	222.298	-68.9487	-23.6736	320.073	0.7623	187.585	64.4074
CAM5-MAM4	210.138	-81.1095	-27.849	329.01	0.6362	179.164	61.5161
CAM5_MAM3	80.4046	-210.843	-72.393	414.315	0.428	215.797	74.094
CAM5.3-Oslo	121.063	-170.184	-58.4328	393.52	0.4663	202.482	69.5221
ECHAM5.5-HAM2-ELVOC_UH	36.0201	-255.227	-87.6322	449.332	0.4085	255.726	87.8037
ECHAM6-HAM2	238.012	-53.235	-18.2782	442.838	0.3125	259.707	89.1703
ECHAM6-HAM2-AP	118.441	-172.806	-59.333	413.709	0.4111	218.719	75.0971
EMAC	124.817	-166.431	-57.1442	341.545	0.6716	190.495	65.4066
GEOS-Chem-APM	178.398	-112.85	-38.747	303.252	0.7954	168.085	57.712
GEOS-Chem-TOMAS	187.787	-103.46	-35.5231	329.924	0.677	171.626	58.9279
GISS-E2.1-MATRIX	242.729	-48.5186	-16.6589	313.782	0.6881	179.499	61.6308
TM4-ECPL	57.651	-233.597	-80.2054	429.633	0.424	235.105	80.7231
TM5	74.5874	-216.66	-74.39	389.705	0.541	217.874	74.8072
MMM	178.226	-113.021	-38.8058	409.668	0.347	219.364	75.3186
Observations	291.248
modeldiversity	3.30056
field=SO4_PM1
MODEL	AVER	ME	NMB	RMSE	IOA	MAE	NME
CAM5-Chem-APM	1.1409	0.5123	81.5007	1.4046	0.301	0.9171	145.908
CAM5-Chem-ATRAS2	0.6129	-0.0157	-2.4919	0.831	0.7158	0.4718	75.0571
CAM5-MAM4	0.9911	0.3626	57.6819	0.9366	0.6606	0.6026	95.8658
CAM5_MAM3	0.7771	0.1485	23.6282	0.6132	0.7541	0.4111	65.4075
CAM5.3-Oslo	1.5971	0.9685	154.077	1.599	0.5657	1.0609	168.787
ECHAM5.5-HAM2-ELVOC_UH	0.9056	0.277	44.074	1.2391	0.6089	0.5848	93.0358
ECHAM6-HAM2	2.5207	1.8921	301.024	3.2561	0.1628	2.1041	334.742
ECHAM6-HAM2-AP	0.8674	0.2388	37.9886	0.9646	0.6614	0.5377	85.5478
EMAC	0.4666	-0.162	-25.7736	0.6897	0.6872	0.4138	65.8248
GEOS-Chem-APM	0.7448	0.1162	18.4861	0.5967	0.7047	0.4241	67.4634
GEOS-Chem-TOMAS	1.3849	0.7563	120.325	1.1418	0.5431	0.8692	138.287
GISS-E2.1-MATRIX	0.7634	0.1348	21.4459	0.8222	0.4918	0.5545	88.2153
TM4-ECPL	0.6377	0.0091	1.4464	0.5693	0.827	0.3259	51.8496
TM5	0.1752	-0.4534	-72.1249	0.7692	0.4884	0.4634	73.7166
MMM	1.694	1.0655	169.507	1.8286	0.3479	1.2184	193.832
Observations	0.6286
modeldiversity	3.82063
field=ORG_PM1
MODEL	AVER	ME	NMB	RMSE	IOA	MAE	NME
CAM5-Chem-APM	0.7427	0.1407	23.3799	1.8031	0.1673	0.9489	157.632
CAM5-Chem-ATRAS2	0.2997	-0.3023	-50.2104	1.2472	0.5646	0.4797	79.6884
CAM5-MAM4	0.8257	0.2237	37.1568	1.2119	0.6459	0.5957	98.9592
CAM5_MAM3	0.251	-0.351	-58.3064	1.2489	0.3757	0.4444	73.8252
CAM5.3-Oslo	0.4374	-0.1646	-27.3399	1.2409	0.3845	0.5162	85.7548
ECHAM5.5-HAM2-ELVOC_UH	0.1877	-0.4143	-68.8178	1.2723	0.3674	0.4614	76.639
ECHAM6-HAM2	1.2044	0.6024	100.065	1.7387	0.2731	1.1426	189.802
ECHAM6-HAM2-AP	0.1427	-0.4593	-76.2911	1.3123	0.3185	0.4915	81.6432
EMAC	0.1518	-0.4502	-74.7819	1.3308	0.2872	0.4926	81.8336
GEOS-Chem-APM	0.2827	-0.3193	-53.0451	1.1219	0.5937	0.3821	63.4709
GEOS-Chem-TOMAS	0.674	0.072	11.9584	1.04	0.7512	0.4311	71.6104
GISS-E2.1-MATRIX	0.2273	-0.3747	-62.239	1.2913	0.2871	0.4653	77.3017
TM4-ECPL	0.5372	-0.0647	-10.7561	1.213	0.414	0.5652	93.8824
TM5	0.0948	-0.5072	-84.2537	1.3494	0.293	0.5154	85.6166
MMM	0.6735	0.0716	11.8871	1.36	0.2778	0.7143	118.661
Observations	0.602
modeldiversity	4.65075
field=nact03
MODEL	AVER	ME	NMB	RMSE	IOA	MAE	NME
CAM5-Chem-APM	139.783	14.4387	11.5192	143.524	0.2959	105.144	83.8842
CAM5-Chem-ATRAS2	185.425	60.08	47.9319	107.313	0.6426	78.2508	62.4286
CAM5-MAM4	133.102	7.7574	6.1888	64.588	0.7545	49.6671	39.6245
CAM5_MAM3	85.4758	-39.8685	-31.8072	64.2733	0.7368	48.9434	39.0471
CAM5.3-Oslo	47.7973	-77.5471	-61.8672	98.1752	0.5569	80.6468	64.3401
ECHAM5.5-HAM2-ELVOC_UH	45.7965	-79.5479	-63.4634	96.9434	0.5968	81.1307	64.7262
ECHAM6-HAM2	192.86	67.5155	53.8639	146.57	0.3452	112.853	90.0347
ECHAM6-HAM2-AP	80.5444	-44.8001	-35.7416	102.582	0.5528	81.7	65.1804
EMAC	62.2743	-63.0701	-50.3174	117.364	0.619	90.1624	71.9317
GEOS-Chem-APM	117.871	-7.4733	-5.9622	93.1874	0.7594	69.7926	55.6806
GEOS-Chem-TOMAS	84.549	-40.7955	-32.5467	74.3071	0.753	58.0227	46.2906
GISS-E2.1-MATRIX	201.926	76.5812	61.0966	144.704	0.4684	100.525	80.1989
TM4-ECPL	88.5518	-36.7927	-29.3532	71.0827	0.7063	54.5329	43.5064
TM5	62.3296	-63.0149	-50.2734	87.8008	0.7072	73.8359	58.9064
MMM	136.702	11.3576	9.0611	90.3412	0.5177	70.5203	56.2612
Observations	125.344
modeldiversity	2.90929
field=nact06
MODEL	AVER	ME	NMB	RMSE	IOA	MAE	NME
CAM5-Chem-APM	197.254	6.697	3.5144	226.048	0.332	159.382	83.6405
CAM5-Chem-ATRAS2	270.532	79.9751	41.9692	157.241	0.7104	115.152	60.4294
CAM5-MAM4	181.547	-9.0099	-4.7282	107.888	0.771	81.1202	42.5702
CAM5_MAM3	109.468	-81.0887	-42.5536	124.868	0.6911	90.2296	47.3506
CAM5.3-Oslo	56.5874	-133.969	-70.3043	175.252	0.5269	136.984	71.8866
ECHAM5.5-HAM2-ELVOC_UH	66.5916	-123.965	-65.0543	161.382	0.6058	125.78	66.0066
ECHAM6-HAM2	248.748	58.1918	30.5378	222.797	0.3576	170.043	89.2351
ECHAM6-HAM2-AP	82.7828	-107.774	-56.5577	170.368	0.5665	132.283	69.4193
EMAC	74.8966	-115.66	-60.696	167.024	0.6734	128.649	67.5124
GEOS-Chem-APM	159.65	-30.9068	-16.2193	143.728	0.812	103.156	54.1339
GEOS-Chem-TOMAS	98.7915	-91.7654	-48.1566	133.015	0.7259	102.397	53.7357
GISS-E2.1-MATRIX	322.828	132.271	69.4131	215.201	0.5837	167.175	87.7298
TM4-ECPL	149.288	-41.2686	-21.6569	115.102	0.7124	83.7891	43.9707
TM5	75.8311	-114.726	-60.2055	147.985	0.7075	118.625	62.2518
MMM	165.766	-24.7912	-13.0099	154.049	0.4997	117.096	61.4493
Observations	190.556
modeldiversity	3.19403

## Sheet: Melpitz
field=CCN02
MODEL	AVER	ME	NMB	RMSE	IOA	MAE	NME
CAM5-Chem-APM	827.294	-533.337	-39.1977	1256.65	0.3681	914.123	67.1837
CAM5-Chem-ATRAS2	1189.91	-170.723	-12.5473	1075.4	0.5256	754.081	55.4213
CAM5-MAM4	616.254	-744.378	-54.7082	1170.95	0.4588	811.138	59.6148
CAM5_MAM3	569.482	-791.15	-58.1457	1183.98	0.4651	842.578	61.9255
CAM5.3-Oslo	246.881	-1113.75	-81.8554	1429.99	0.4334	1115.36	81.9738
ECHAM5.5-HAM2-ELVOC_UH	309.744	-1050.89	-77.2351	1369.19	0.4481	1053.81	77.45
ECHAM6-HAM2	321.818	-1038.81	-76.3478	1364.9	0.446	1044.06	76.7334
ECHAM6-HAM2-AP	270.881	-1089.75	-80.0915	1416.73	0.4305	1092.3	80.2787
EMAC	406.931	-953.701	-70.0924	1299.54	0.4625	973.374	71.5383
GEOS-Chem-APM	1207.67	-152.959	-11.2417	990.626	0.5168	694.242	51.0235
GEOS-Chem-TOMAS	757.598	-603.032	-44.3199	1070.64	0.4679	707.856	52.024
GISS-E2.1-MATRIX	1186.78	-173.857	-12.7776	876.638	0.6305	604.201	44.4058
TM4-ECPL	643.919	-716.714	-52.675	1107.08	0.5142	773.783	56.8693
TM5	563.774	-796.858	-58.5652	1104.31	0.5385	820.083	60.2722
MMM	296.349	-1064.28	-78.2197	1389.38	0.4384	1067.37	78.4463
Observations	1360.63
modeldiversity	2.73285
field=CCN07
MODEL	AVER	ME	NMB	RMSE	IOA	MAE	NME
CAM5-Chem-APM	1875.52	-1095.04	-36.8631	2414.3	0.3542	1743.86	58.7047
CAM5-Chem-ATRAS2	1734.03	-1236.54	-41.6264	2217.71	0.4743	1556.97	52.4133
CAM5-MAM4	1301.62	-1668.94	-56.1826	2399.01	0.467	1750.24	58.9195
CAM5_MAM3	1346.86	-1623.7	-54.6598	2441.76	0.4589	1792.07	60.3276
CAM5.3-Oslo	461.625	-2508.93	-84.46	3048.03	0.423	2512.83	84.5913
ECHAM5.5-HAM2-ELVOC_UH	462.626	-2507.93	-84.4262	3039.06	0.423	2508.37	84.4411
ECHAM6-HAM2	436.181	-2534.37	-85.3164	3066.86	0.4205	2535.36	85.3498
ECHAM6-HAM2-AP	378.118	-2592.44	-87.2711	3120.93	0.4151	2592.87	87.2857
EMAC	498.458	-2472.1	-83.2199	3001.21	0.4283	2473.25	83.2588
GEOS-Chem-APM	2186.98	-783.581	-26.3782	2086.21	0.4524	1492.89	50.2562
GEOS-Chem-TOMAS	1729.5	-1241.06	-41.7786	2147.05	0.4665	1459.13	49.1197
GISS-E2.1-MATRIX	4672.05	1701.48	57.2782	2985.01	0.4575	2338.66	78.728
TM4-ECPL	5750.33	2779.78	93.5776	3628.61	0.4501	3052.55	102.76
TM5	716.337	-2254.22	-75.8854	2783.61	0.4536	2255	75.9118
MMM	407.151	-2563.41	-86.2938	3093.1	0.4179	2563.93	86.3114
Observations	2970.56
modeldiversity	3.97465
field=N50
MODEL	AVER	ME	NMB	RMSE	IOA	MAE	NME
CAM5-Chem-APM	1586.97	-530.874	-25.0667	1566.46	0.4343	1222.47	57.7225
CAM5-Chem-ATRAS2	1394.86	-722.986	-34.1378	1289.91	0.6467	973.943	45.9875
CAM5-MAM4	1514.26	-603.596	-28.5005	1127.25	0.6963	835.414	39.4465
CAM5_MAM3	1153.99	-963.853	-45.5111	1469.11	0.5842	1164.9	55.004
CAM5.3-Oslo	3324.31	1206.47	56.9668	4030.62	0.3336	2069.22	97.7042
ECHAM5.5-HAM2-ELVOC_UH	805.475	-1312.37	-61.9673	1651.18	0.5322	1349.56	63.7235
ECHAM6-HAM2	441.259	-1676.58	-79.1646	1966.52	0.4665	1680.86	79.3664
ECHAM6-HAM2-AP	373.402	-1744.44	-82.3687	2039.08	0.4521	1746.83	82.4816
EMAC	1073.49	-1044.35	-49.3121	1455.34	0.5648	1135.52	53.6169
GEOS-Chem-APM	1763.74	-354.102	-16.7199	1200.56	0.6442	885.97	41.8336
GEOS-Chem-TOMAS	2576	458.147	21.6327	1542.16	0.5565	1114.21	52.6106
GISS-E2.1-MATRIX	5200.08	3082.24	145.537	3985.48	0.3565	3168.86	149.627
TM4-ECPL	4202.36	2084.51	98.4259	2615.99	0.4909	2149.47	101.494
TM5	695.968	-1421.88	-67.138	1693.39	0.5243	1429.66	67.5055
MMM	407.33	-1710.51	-80.7668	2001.55	0.4595	1713.38	80.9019
Observations	2117.84
modeldiversity	3.4534
field=N80
MODEL	AVER	ME	NMB	RMSE	IOA	MAE	NME
CAM5-Chem-APM	1035.03	-423.529	-29.0376	1187.39	0.4273	910.488	62.4242
CAM5-Chem-ATRAS2	1184.04	-274.516	-18.8212	900.221	0.6919	642.172	44.0281
CAM5-MAM4	1152.99	-305.565	-20.9499	806.034	0.7083	574.096	39.3607
CAM5_MAM3	846.617	-611.937	-41.9552	1014.56	0.6077	769.092	52.7299
CAM5.3-Oslo	1203.21	-255.347	-17.5069	1173.67	0.6207	751.095	51.496
ECHAM5.5-HAM2-ELVOC_UH	430.38	-1028.17	-70.4928	1279.64	0.5065	1037.36	71.1224
ECHAM6-HAM2	360.77	-1097.79	-75.2659	1346.6	0.4866	1103.99	75.6908
ECHAM6-HAM2-AP	319.417	-1139.14	-78.1008	1396.63	0.468	1144.1	78.441
EMAC	640.064	-818.489	-56.1166	1119.32	0.5567	866.122	59.3824
GEOS-Chem-APM	1302.78	-155.773	-10.68	844.641	0.6819	613.615	42.0702
GEOS-Chem-TOMAS	2085.58	627.021	42.9893	1332.78	0.5328	955.321	65.498
GISS-E2.1-MATRIX	3185.38	1726.82	118.393	2412.35	0.4228	1846.71	126.613
TM4-ECPL	839.211	-619.347	-42.4632	921.762	0.6425	684.081	46.9014
TM5	560.706	-897.848	-61.5576	1126.2	0.569	911.883	62.5198
MMM	340.094	-1118.46	-76.6831	1370.27	0.4775	1123.31	77.0158
Observations	1458.55
modeldiversity	3.08023
field=N120
MODEL	AVER	ME	NMB	RMSE	IOA	MAE	NME
CAM5-Chem-APM	654.769	-217.775	-24.9587	753.139	0.4189	566.755	64.9542
CAM5-Chem-ATRAS2	841.017	-31.5257	-3.6131	609.708	0.6917	424.483	48.6488
CAM5-MAM4	750.227	-122.317	-14.0184	518.13	0.6931	360.99	41.3721
CAM5_MAM3	527.49	-345.056	-39.5459	609.805	0.6105	444.3	50.92
CAM5.3-Oslo	460.414	-412.131	-47.2333	643.244	0.5837	464.091	53.1882
ECHAM5.5-HAM2-ELVOC_UH	199.418	-673.123	-77.1448	834.1	0.4826	674.836	77.3411
ECHAM6-HAM2	269.74	-602.806	-69.086	780.68	0.5006	612.007	70.1404
ECHAM6-HAM2-AP	249.585	-622.961	-71.3958	809.581	0.4762	631.928	72.4236
EMAC	401.08	-471.463	-54.0331	692.008	0.5711	519.823	59.5755
GEOS-Chem-APM	840.744	-31.8006	-3.6446	532.801	0.7115	386.092	44.249
GEOS-Chem-TOMAS	1580.52	707.975	81.1391	1078.15	0.4819	806.448	92.4248
GISS-E2.1-MATRIX	1512.62	640.073	73.357	1100.79	0.5235	785.719	90.0492
TM4-ECPL	286.915	-585.63	-67.1174	732.618	0.5476	590.612	67.6885
TM5	473.239	-399.308	-45.7636	578.819	0.6662	439.012	50.314
MMM	259.662	-612.883	-70.2409	793.582	0.4889	620.789	71.1469
Observations	872.545
modeldiversity	2.98228
field=SO4_PM1
MODEL	AVER	ME	NMB	RMSE	IOA	MAE	NME
CAM5-Chem-APM	1.7841	0.1529	9.3707	2.147	0.2841	1.487	91.1578
CAM5-Chem-ATRAS2	2.3882	0.757	46.4069	2.3006	0.5071	1.5362	94.1741
CAM5-MAM4	2.4145	0.7833	48.0172	2.6496	0.3452	1.5847	97.1489
CAM5_MAM3	1.9426	0.3114	19.0879	1.5367	0.6171	0.9907	60.7325
CAM5.3-Oslo	3.509	1.8778	115.119	3.2855	0.3219	2.4802	152.046
ECHAM5.5-HAM2-ELVOC_UH	2.8106	1.1794	72.3016	4.2368	0.3498	1.887	115.679
ECHAM6-HAM2	2.9671	1.3358	81.8935	3.051	0.4668	1.8153	111.287
ECHAM6-HAM2-AP	2.0452	0.414	25.3806	1.9211	0.5412	1.2379	75.8903
EMAC	2.0227	0.3915	23.9995	1.894	0.5883	1.2347	75.6896
GEOS-Chem-APM	1.1635	-0.4677	-28.6701	1.4345	0.5278	0.9249	56.7005
GEOS-Chem-TOMAS	1.3566	-0.2746	-16.8326	1.2936	0.5782	0.8576	52.577
GISS-E2.1-MATRIX	1.7525	0.1213	7.4356	1.4791	0.5795	0.9689	59.398
TM4-ECPL	2.7732	1.142	70.0107	2.7693	0.5068	1.4851	91.0403
TM5	0.476	-1.1552	-70.8167	1.714	0.4606	1.1709	71.7801
MMM	2.5061	0.8749	53.6372	2.3265	0.5316	1.4463	88.6648
Observations	1.6312
modeldiversity	2.57117
field=ORG_PM1
MODEL	AVER	ME	NMB	RMSE	IOA	MAE	NME
CAM5-Chem-APM	2.4143	-2.3421	-49.2411	5.0403	0.3913	3.4839	73.2473
CAM5-Chem-ATRAS2	2.4362	-2.3202	-48.7813	4.631	0.5805	3.1105	65.3968
CAM5-MAM4	5.2656	0.5092	10.705	4.7215	0.5625	3.2777	68.9111
CAM5_MAM3	2.9812	-1.7752	-37.3226	4.1075	0.5768	2.6738	56.2151
CAM5.3-Oslo	1.8462	-2.9101	-61.1842	4.7328	0.517	3.1091	65.3664
ECHAM5.5-HAM2-ELVOC_UH	1.8389	-2.9175	-61.3388	4.638	0.5215	3.0757	64.665
ECHAM6-HAM2	1.9035	-2.8529	-59.9796	4.628	0.5136	3.0653	64.447
ECHAM6-HAM2-AP	1.5582	-3.1982	-67.2396	4.9581	0.487	3.3537	70.5107
EMAC	0.6806	-4.0758	-85.6918	5.6446	0.442	4.0895	85.9785
GEOS-Chem-APM	2.9759	-1.7805	-37.4346	3.8281	0.6209	2.3545	49.5012
GEOS-Chem-TOMAS	8.7667	4.0103	84.3142	6.562	0.5609	4.8579	102.135
GISS-E2.1-MATRIX	2.8198	-1.9366	-40.7158	3.9392	0.5924	2.5081	52.7305
TM4-ECPL	3.2213	-1.5351	-32.2752	3.5771	0.6402	2.152	45.2439
TM5	1.3255	-3.4309	-72.1332	4.9288	0.4937	3.4548	72.6343
MMM	1.7309	-3.0255	-63.6095	4.7822	0.5006	3.1995	67.2671
Observations	4.7564
modeldiversity	3.44063
field=SS_PM1
MODEL	AVER	ME	NMB	RMSE	IOA	MAE	NME
CAM5-Chem-APM	2.0769	1.9638	1736.62	3.4604	0.0318	1.9957	1764.83
CAM5-Chem-ATRAS2	0.2887	0.1757	155.334	0.5348	0.0868	0.2952	261.013
CAM5-MAM4	0.4879	0.3748	331.432	0.9504	0.0462	0.4895	432.835
CAM5_MAM3	0.9175	0.8044	711.351	1.5176	0.0478	0.8672	766.902
CAM5.3-Oslo	0.2684	0.1553	137.373	0.4782	0.1362	0.2778	245.66
ECHAM5.5-HAM2-ELVOC_UH	0.0831	-0.0299	-26.4776	0.2111	0.2337	0.1259	111.308
ECHAM6-HAM2	0.22	0.1069	94.5577	0.4375	0.1074	0.2401	212.278
ECHAM6-HAM2-AP	0.6806	0.5675	501.882	1.2559	0.0414	0.6649	587.999
EMAC	0.3315	0.2184	193.107	0.4156	0.1975	0.2885	255.15
GEOS-Chem-APM	1.1279	1.0148	897.431	2.6051	0.0245	1.0876	961.795
GEOS-Chem-TOMAS	0.3119	0.1988	175.839	0.4985	0.147	0.2756	243.701
GISS-E2.1-MATRIX	1.462	1.3489	1192.87	2.8113	0.0307	1.3994	1237.48
TM4-ECPL	1.1518	1.0387	918.516	1.7283	0.0471	1.0773	952.664
TM5	0.0952	-0.0179	-15.8426	0.1703	0.2294	0.1013	89.5814
MMM	0.4503	0.3372	298.22	0.8327	0.0591	0.4463	394.668
Observations	0.1131
modeldiversity	4.95337

## Sheet: PuydeDome
field=CCN02
MODEL	AVER	ME	NMB	RMSE	IOA	MAE	NME
CAM5-Chem-APM	298.862	-40.0887	-11.8273	354.947	0.5425	249.22	73.527
CAM5-Chem-ATRAS2	350.243	11.2929	3.3317	260.519	0.7929	174.67	51.5325
CAM5-MAM4	120.543	-218.407	-64.4364	333.363	0.5482	229.598	67.738
CAM5_MAM3	166.046	-172.905	-51.0119	325.613	0.4906	226.691	66.8802
CAM5.3-Oslo	103.417	-235.533	-69.4891	339.925	0.5447	239.493	70.6572
ECHAM5.5-HAM2-ELVOC_UH	179.578	-159.372	-47.0194	301.464	0.5897	199.172	58.7614
ECHAM6-HAM2	154.812	-184.138	-54.326	313.32	0.5777	212.9	62.8117
ECHAM6-HAM2-AP	131.766	-207.184	-61.1253	332.719	0.5306	230.68	68.0573
EMAC	79.9102	-259.04	-76.4242	369.956	0.5123	265.363	78.2895
GEOS-Chem-APM	427.306	88.3556	26.0674	315.177	0.7444	185.588	54.7538
GEOS-Chem-TOMAS	362.784	23.8333	7.0315	258.596	0.6926	173.653	51.2326
GISS-E2.1-MATRIX	220.023	-118.927	-35.087	292.974	0.542	193.431	57.0677
TM4-ECPL	130.41	-208.541	-61.5255	322.954	0.5735	219.166	64.6602
TM5	103.667	-235.283	-69.4152	348.179	0.5136	244.388	72.1014
MMM	143.289	-195.661	-57.7257	321.469	0.5544	220.149	64.9502
Observations	338.95
modeldiversity	3.46984
field=N50
MODEL	AVER	ME	NMB	RMSE	IOA	MAE	NME
CAM5-Chem-APM	665.041	-88.2006	-11.7095	665.788	0.6193	506.253	67.2099
CAM5-Chem-ATRAS2	591.706	-161.536	-21.4454	469.054	0.7789	330.735	43.9082
CAM5-MAM4	231.916	-521.325	-69.2109	708.975	0.5433	534.781	70.9973
CAM5_MAM3	233.187	-520.054	-69.0421	735.983	0.5094	552.016	73.2854
CAM5.3-Oslo	1875.49	1122.25	148.989	2212.12	0.4327	1259.48	167.208
ECHAM5.5-HAM2-ELVOC_UH	360.768	-392.474	-52.1046	625.888	0.5774	445.747	59.1771
ECHAM6-HAM2	237.203	-516.039	-68.5091	704.649	0.5539	527.62	70.0466
ECHAM6-HAM2-AP	191.84	-561.402	-74.5314	751.368	0.5218	572.064	75.947
EMAC	180.478	-572.763	-76.0398	756.994	0.5247	580.905	77.1207
GEOS-Chem-APM	748.21	-5.0315	-0.668	543.618	0.7687	366.972	48.7191
GEOS-Chem-TOMAS	834.627	81.3864	10.8048	620.498	0.6316	418.01	55.4947
GISS-E2.1-MATRIX	951.788	198.546	26.3589	774.047	0.3844	573.779	76.1746
TM4-ECPL	297.559	-455.683	-60.4963	648.432	0.5746	482.712	64.0846
TM5	149.604	-603.638	-80.1386	788.199	0.5051	607.389	80.6367
MMM	214.521	-538.72	-71.5202	727.089	0.538	549.035	72.8896
Observations	753.242
modeldiversity	4.41198
field=N80
MODEL	AVER	ME	NMB	RMSE	IOA	MAE	NME
CAM5-Chem-APM	415.111	-33.5726	-7.4825	458.471	0.6038	334.519	74.5558
CAM5-Chem-ATRAS2	448.599	-0.084	-0.0187	301.087	0.8445	211.5	47.138
CAM5-MAM4	175.802	-272.881	-60.8183	418.549	0.59	295.084	65.7667
CAM5_MAM3	189.39	-259.293	-57.7897	432.192	0.5355	307.582	68.5521
CAM5.3-Oslo	601.884	153.201	34.1447	499.511	0.7582	293.948	65.5135
ECHAM5.5-HAM2-ELVOC_UH	228.041	-220.642	-49.1755	396.217	0.5975	272.1	60.6441
ECHAM6-HAM2	194.255	-254.429	-56.7057	409.115	0.5985	285.214	63.567
ECHAM6-HAM2-AP	167.174	-281.509	-62.7411	436.588	0.5594	309.156	68.9029
EMAC	134.069	-314.614	-70.1194	458.743	0.5505	330.698	73.7041
GEOS-Chem-APM	527.343	78.6595	17.5312	351.59	0.8037	224.809	50.1041
GEOS-Chem-TOMAS	611.553	162.871	36.2997	392.891	0.7177	284.914	63.5
GISS-E2.1-MATRIX	521.759	73.0755	16.2867	469.023	0.4214	347.912	77.5407
TM4-ECPL	106.462	-342.222	-76.2725	481.868	0.5246	348.263	77.619
TM5	115.617	-333.066	-74.232	475.782	0.5255	343.221	76.4952
MMM	180.715	-267.969	-59.7234	421.776	0.5789	296.011	65.9734
Observations	448.683
modeldiversity	3.86009
field=N120
MODEL	AVER	ME	NMB	RMSE	IOA	MAE	NME
CAM5-Chem-APM	262.651	-38.6982	-12.8416	320.13	0.5816	231.213	76.7258
CAM5-Chem-ATRAS2	285.627	-15.7224	-5.2173	218.504	0.8459	148.601	49.3119
CAM5-MAM4	121.707	-179.643	-59.6126	287.5	0.6025	198.118	65.7434
CAM5_MAM3	136.343	-165.006	-54.7557	294.007	0.5397	206.459	68.5114
CAM5.3-Oslo	201.283	-100.066	-33.206	215.631	0.7794	146.24	48.5283
ECHAM5.5-HAM2-ELVOC_UH	158.097	-143.253	-47.537	274.189	0.6055	185.002	61.3911
ECHAM6-HAM2	147.421	-153.929	-51.0799	277.047	0.6062	188.077	62.4115
ECHAM6-HAM2-AP	137.355	-163.995	-54.42	288.325	0.5745	199.386	66.1644
EMAC	97.8628	-203.487	-67.5251	315.697	0.5535	222.73	73.9107
GEOS-Chem-APM	314.21	12.8599	4.2674	217.337	0.8244	147.453	48.9308
GEOS-Chem-TOMAS	491.311	189.961	63.0367	317.98	0.6982	242.486	80.4665
GISS-E2.1-MATRIX	221.021	-80.3286	-26.6563	300.56	0.4379	219.005	72.6748
TM4-ECPL	63.6685	-237.681	-78.8721	340.299	0.5158	241.23	80.0499
TM5	96.1191	-205.231	-68.1038	311.575	0.5409	218.804	72.6081
MMM	142.388	-158.962	-52.75	281.705	0.5906	192.763	63.9666
Observations	301.35
modeldiversity	3.59559

## Sheet: Vavihill
field=nact03
MODEL	AVER	ME	NMB	RMSE	IOA	MAE	NME
CAM5-Chem-APM	251.328	86.0313	52.0468	182.958	0.3211	140.77	85.1624
CAM5-Chem-ATRAS2	276.356	111.06	67.1887	159.517	0.427	128.972	78.0246
CAM5-MAM4	207.04	41.7432	25.2536	89.6688	0.6074	73.2263	44.3001
CAM5_MAM3	212.296	46.9997	28.4336	94.1196	0.6677	68.3347	41.3408
CAM5.3-Oslo	115.981	-49.3158	-29.8348	106.391	0.4444	74.669	45.1728
ECHAM5.5-HAM2-ELVOC_UH	114.62	-50.676	-30.6577	100.835	0.4695	73.2279	44.301
ECHAM6-HAM2	168.798	3.5013	2.1182	93.0273	0.5426	74.2768	44.9356
ECHAM6-HAM2-AP	151.432	-13.864	-8.3873	104.914	0.3968	81.0387	49.0264
EMAC	164.105	-1.1913	-0.7207	192.842	0.2835	144.173	87.2213
GEOS-Chem-APM	352.465	187.169	113.232	228.587	0.4084	192.44	116.421
GEOS-Chem-TOMAS	254.636	89.3394	54.0481	126.732	0.5504	100.724	60.9352
GISS-E2.1-MATRIX	314.724	149.428	90.4	167.671	0.5232	149.754	90.5974
TM4-ECPL	230.034	64.7385	39.1651	94.0391	0.6134	76.6121	46.3483
TM5	168.149	2.8527	1.7258	77.5092	0.799	57.8544	35.0005
MMM	160.115	-5.1813	-3.1345	94.8384	0.4752	75.1244	45.4483
Observations	165.296
modeldiversity	1.95685
field=nact06
MODEL	AVER	ME	NMB	RMSE	IOA	MAE	NME
CAM5-Chem-APM	384.718	130.946	51.6001	299.151	0.3031	224.428	88.4371
CAM5-Chem-ATRAS2	412.719	158.949	62.6347	242.926	0.4517	199.681	78.6852
CAM5-MAM4	288.84	35.0691	13.8192	126.597	0.6833	98.6057	38.8561
CAM5_MAM3	296.722	42.9515	16.9253	137.452	0.7087	100.793	39.718
CAM5.3-Oslo	156.052	-97.72	-38.5071	178.412	0.4609	125.652	49.5137
ECHAM5.5-HAM2-ELVOC_UH	158.267	-95.5041	-37.6339	170.541	0.4974	125.295	49.3732
ECHAM6-HAM2	212.412	-41.3594	-16.2979	153.53	0.5356	117.723	46.3894
ECHAM6-HAM2-AP	188.012	-65.7594	-25.9128	172.964	0.4301	127.615	50.2872
EMAC	177.914	-75.8568	-29.8918	234.132	0.4177	182.782	72.0261
GEOS-Chem-APM	549.036	295.265	116.351	377.487	0.4212	306.285	120.693
GEOS-Chem-TOMAS	356.538	102.766	40.4957	170.372	0.6148	133.2	52.4882
GISS-E2.1-MATRIX	527.529	273.758	107.876	303.7	0.489	274.206	108.052
TM4-ECPL	405.288	151.517	59.7061	192.474	0.5246	163.852	64.5669
TM5	200.396	-53.3754	-21.0328	118.251	0.8019	93.3333	36.7785
MMM	200.212	-53.5596	-21.1054	159.038	0.4863	119.947	47.2656
Observations	253.772
modeldiversity	2.28929
field=CCN02
MODEL	AVER	ME	NMB	RMSE	IOA	MAE	NME
CAM5-Chem-APM	458.61	28.2031	6.5527	570.912	0.2959	406.657	94.4821
CAM5-Chem-ATRAS2	590.219	159.811	37.1303	460.697	0.606	316.704	73.5825
CAM5-MAM4	289.259	-141.147	-32.794	309.319	0.6259	211.218	49.074
CAM5_MAM3	275.767	-154.639	-35.9286	321.994	0.6044	226.792	52.6925
CAM5.3-Oslo	127.469	-302.938	-70.3841	425.641	0.4768	314.795	73.139
ECHAM5.5-HAM2-ELVOC_UH	201.977	-228.43	-53.0731	366.522	0.5609	265.78	61.7509
ECHAM6-HAM2	229.849	-200.557	-46.5971	351.955	0.5498	246.703	57.3186
ECHAM6-HAM2-AP	203.436	-226.971	-52.734	380.867	0.4897	267.182	62.0765
EMAC	239.198	-191.209	-44.4251	374.601	0.5673	260.104	60.432
GEOS-Chem-APM	811.979	381.572	88.6538	639.279	0.5713	440.913	102.441
GEOS-Chem-TOMAS	372.609	-57.7974	-13.4285	307.974	0.6488	213.69	49.6483
GISS-E2.1-MATRIX	479.774	49.3676	11.47	302.32	0.7534	209.412	48.6544
TM4-ECPL	260.3	-170.107	-39.5224	308.394	0.6474	214.575	49.8539
TM5	236.955	-193.452	-44.9463	287.909	0.7294	216.022	50.1902
MMM	216.643	-213.764	-49.6656	363.476	0.5193	253.976	59.0084
Observations	430.407
modeldiversity	3.03568
field=CCN07
MODEL	AVER	ME	NMB	RMSE	IOA	MAE	NME
CAM5-Chem-APM	1188.64	193.605	19.457	1130.52	0.3348	855.467	85.9733
CAM5-Chem-ATRAS2	1033.23	38.1887	3.8379	711.695	0.6733	509.822	51.2364
CAM5-MAM4	533.224	-461.815	-46.4118	683.319	0.6075	511.972	51.4525
CAM5_MAM3	551.86	-443.177	-44.5387	764.417	0.5594	583.357	58.6266
CAM5.3-Oslo	261.324	-733.717	-73.7375	940.09	0.4852	747.74	75.1468
ECHAM5.5-HAM2-ELVOC_UH	292.029	-703.009	-70.6514	888.873	0.5083	711.323	71.487
ECHAM6-HAM2	310.697	-684.341	-68.7754	891.121	0.488	699.28	70.2767
ECHAM6-HAM2-AP	275.544	-719.496	-72.3083	927.739	0.4716	731.115	73.4761
EMAC	289.551	-705.487	-70.9005	904.98	0.4987	716.365	71.9937
GEOS-Chem-APM	1524.54	529.502	53.2142	1094.28	0.584	711.434	71.4981
GEOS-Chem-TOMAS	650.72	-344.32	-34.6037	644.609	0.6029	471.246	47.3596
GISS-E2.1-MATRIX	2328.82	1333.79	134.044	1640.28	0.4469	1367.33	137.414
TM4-ECPL	2606.77	1611.73	161.976	2005.23	0.3635	1630.11	163.824
TM5	294.959	-700.081	-70.3572	866.38	0.5238	708.799	71.2334
MMM	293.121	-701.918	-70.5418	907.898	0.4804	713.302	71.6858
Observations	995.038
modeldiversity	3.92165
field=CCN10
MODEL	AVER	ME	NMB	RMSE	IOA	MAE	NME
CAM5-Chem-APM	1420.4	238.098	20.1385	1291.48	0.3361	975.968	82.5479
CAM5-Chem-ATRAS2	1133.4	-48.9004	-4.136	801.306	0.6518	583.43	49.3468
CAM5-MAM4	578.072	-604.234	-51.1065	830.245	0.5742	644.998	54.5543
CAM5_MAM3	597.245	-585.059	-49.4846	916.183	0.5338	714.848	60.4622
CAM5.3-Oslo	294.932	-887.373	-75.0545	1108.42	0.4754	905.789	76.6121
ECHAM5.5-HAM2-ELVOC_UH	325.218	-857.088	-72.4929	1051.77	0.4962	863.831	73.0633
ECHAM6-HAM2	322.115	-860.189	-72.7553	1070.14	0.4741	869.604	73.5516
ECHAM6-HAM2-AP	284.026	-898.279	-75.9769	1107.8	0.4621	904.336	76.4892
EMAC	331.951	-850.352	-71.9232	1058.33	0.4865	859.771	72.7199
GEOS-Chem-APM	1706.01	523.703	44.2951	1219.08	0.573	780.688	66.031
GEOS-Chem-TOMAS	725.629	-456.676	-38.6259	768.206	0.5747	576.136	48.7299
GISS-E2.1-MATRIX	3022.09	1839.78	155.61	2198.89	0.3831	1866.84	157.899
TM4-ECPL	3931.61	2749.32	232.539	3261.18	0.2706	2751.97	232.763
TM5	329.488	-852.818	-72.1318	1028.95	0.5045	860.192	72.7555
MMM	303.07	-879.235	-74.3661	1087.62	0.4686	885.462	74.8928
Observations	1182.31
modeldiversity	4.31537
field=N50
MODEL	AVER	ME	NMB	RMSE	IOA	MAE	NME
CAM5-Chem-APM	1053.58	-198.957	-15.8843	1103.19	0.4339	856.983	68.4196
CAM5-Chem-ATRAS2	976.129	-276.412	-22.0681	827.413	0.6479	601.475	48.0204
CAM5-MAM4	728.607	-523.934	-41.8297	836.625	0.5959	612.942	48.9359
CAM5_MAM3	515.528	-737.015	-58.8416	1021.64	0.5182	789.607	63.0404
CAM5.3-Oslo	2480.7	1228.15	98.053	3288.43	0.274	1736.69	138.653
ECHAM5.5-HAM2-ELVOC_UH	403.128	-849.416	-67.8155	1096.13	0.4981	867.248	69.2391
ECHAM6-HAM2	332.093	-920.449	-73.4866	1164.27	0.4755	926.798	73.9934
ECHAM6-HAM2-AP	289.776	-962.764	-76.8649	1202.08	0.4649	966.372	77.153
EMAC	749.772	-502.77	-40.14	876.877	0.569	639.139	51.0275
GEOS-Chem-APM	1255.66	3.1178	0.2489	800.532	0.7257	577.65	46.1183
GEOS-Chem-TOMAS	932.426	-320.118	-25.5575	938.921	0.5063	663.271	52.954
GISS-E2.1-MATRIX	2438.36	1185.82	94.6728	1549.99	0.4928	1269.27	101.335
TM4-ECPL	2037.87	785.332	62.6991	1300.97	0.4757	973.028	77.6844
TM5	331.985	-920.557	-73.4952	1127.2	0.4997	925.118	73.8593
MMM	310.935	-941.605	-75.1757	1182.01	0.4707	945.554	75.4909
Observations	1252.54
modeldiversity	3.35184
field=N80
MODEL	AVER	ME	NMB	RMSE	IOA	MAE	NME
CAM5-Chem-APM	612.815	-172.056	-21.9216	771.668	0.4051	583.956	74.4015
CAM5-Chem-ATRAS2	756.353	-28.5185	-3.6335	548.991	0.7228	384.453	48.983
CAM5-MAM4	561.98	-222.891	-28.3984	492.752	0.6886	342.856	43.683
CAM5_MAM3	394.579	-390.292	-49.7268	624.17	0.5623	450.419	57.3875
CAM5.3-Oslo	876.626	91.7533	11.6902	889.081	0.5617	534.338	68.0796
ECHAM5.5-HAM2-ELVOC_UH	241.039	-543.833	-69.2893	729.541	0.5076	554.933	70.7037
ECHAM6-HAM2	278.15	-506.72	-64.5609	708.578	0.5128	524.756	66.8588
ECHAM6-HAM2-AP	251.402	-533.47	-67.9691	734.819	0.4941	546.226	69.5942
EMAC	440.653	-344.219	-43.8567	594.161	0.6078	418.531	53.3248
GEOS-Chem-APM	904.353	119.482	15.2231	579.536	0.7421	396.951	50.5753
GEOS-Chem-TOMAS	750.702	-34.1678	-4.3533	592.57	0.5712	413.631	52.7005
GISS-E2.1-MATRIX	1368.91	584.044	74.4126	858.893	0.5803	681.849	86.8739
TM4-ECPL	399.066	-385.803	-49.1549	608.927	0.5517	431.938	55.0329
TM5	270.861	-514.01	-65.4896	672.597	0.5565	522.795	66.6089
MMM	264.775	-520.095	-66.2649	720.164	0.5039	533.653	67.9924
Observations	784.872
modeldiversity	2.8998
field=N120
MODEL	AVER	ME	NMB	RMSE	IOA	MAE	NME
CAM5-Chem-APM	372.039	-66.0197	-15.071	492.834	0.3421	358.618	81.8652
CAM5-Chem-ATRAS2	485.983	47.9248	10.9403	372.321	0.7162	253.131	57.7847
CAM5-MAM4	364.627	-73.4315	-16.7629	273.553	0.7397	189.691	43.3028
CAM5_MAM3	255.938	-182.121	-41.5745	334.971	0.6063	230.218	52.5541
CAM5.3-Oslo	313.533	-124.526	-28.4268	340.008	0.6297	222.723	50.8433
ECHAM5.5-HAM2-ELVOC_UH	127.469	-310.591	-70.9016	424.659	0.5052	315.512	72.025
ECHAM6-HAM2	206.177	-231.882	-52.9341	376.188	0.5512	264.311	60.3369
ECHAM6-HAM2-AP	195.421	-242.637	-55.3892	389.041	0.5233	270.482	61.7455
EMAC	272.753	-165.306	-37.7361	344.553	0.6536	237.77	54.2781
GEOS-Chem-APM	584.374	146.315	33.4008	403.223	0.7145	270.972	61.8575
GEOS-Chem-TOMAS	581.598	143.539	32.7671	373.112	0.646	273.466	62.4268
GISS-E2.1-MATRIX	586.479	148.421	33.8815	360.892	0.6891	266.874	60.9221
TM4-ECPL	133.809	-304.25	-69.4542	406.677	0.5331	308.23	70.3628
TM5	222.101	-215.957	-49.2988	319.452	0.6776	234.165	53.4551
MMM	200.799	-237.26	-54.1617	380.744	0.5373	265.307	60.5642
Observations	438.058
modeldiversity	2.74914
field=nact03
MODEL	AVER	ME	NMB	RMSE	IOA	MAE	NME
CAM5-Chem-APM	251.328	86.0313	52.0468	182.958	0.3211	140.77	85.1624
CAM5-Chem-ATRAS2	276.356	111.06	67.1887	159.517	0.427	128.972	78.0246
CAM5-MAM4	207.04	41.7432	25.2536	89.6688	0.6074	73.2263	44.3001
CAM5_MAM3	212.296	46.9997	28.4336	94.1196	0.6677	68.3347	41.3408
CAM5.3-Oslo	115.981	-49.3158	-29.8348	106.391	0.4444	74.669	45.1728
ECHAM5.5-HAM2-ELVOC_UH	114.62	-50.676	-30.6577	100.835	0.4695	73.2279	44.301
ECHAM6-HAM2	168.798	3.5013	2.1182	93.0273	0.5426	74.2768	44.9356
ECHAM6-HAM2-AP	151.432	-13.864	-8.3873	104.914	0.3968	81.0387	49.0264
EMAC	164.105	-1.1913	-0.7207	192.842	0.2835	144.173	87.2213
GEOS-Chem-APM	352.465	187.169	113.232	228.587	0.4084	192.44	116.421
GEOS-Chem-TOMAS	254.636	89.3394	54.0481	126.732	0.5504	100.724	60.9352
GISS-E2.1-MATRIX	314.724	149.428	90.4	167.671	0.5232	149.754	90.5974
TM4-ECPL	230.034	64.7385	39.1651	94.0391	0.6134	76.6121	46.3483
TM5	168.149	2.8527	1.7258	77.5092	0.799	57.8544	35.0005
MMM	160.115	-5.1813	-3.1345	94.8384	0.4752	75.1244	45.4483
Observations	165.296
modeldiversity	1.95685
field=nact06
MODEL	AVER	ME	NMB	RMSE	IOA	MAE	NME
CAM5-Chem-APM	384.718	130.946	51.6001	299.151	0.3031	224.428	88.4371
CAM5-Chem-ATRAS2	412.719	158.949	62.6347	242.926	0.4517	199.681	78.6852
CAM5-MAM4	288.84	35.0691	13.8192	126.597	0.6833	98.6057	38.8561
CAM5_MAM3	296.722	42.9515	16.9253	137.452	0.7087	100.793	39.718
CAM5.3-Oslo	156.052	-97.72	-38.5071	178.412	0.4609	125.652	49.5137
ECHAM5.5-HAM2-ELVOC_UH	158.267	-95.5041	-37.6339	170.541	0.4974	125.295	49.3732
ECHAM6-HAM2	212.412	-41.3594	-16.2979	153.53	0.5356	117.723	46.3894
ECHAM6-HAM2-AP	188.012	-65.7594	-25.9128	172.964	0.4301	127.615	50.2872
EMAC	177.914	-75.8568	-29.8918	234.132	0.4177	182.782	72.0261
GEOS-Chem-APM	549.036	295.265	116.351	377.487	0.4212	306.285	120.693
GEOS-Chem-TOMAS	356.538	102.766	40.4957	170.372	0.6148	133.2	52.4882
GISS-E2.1-MATRIX	527.529	273.758	107.876	303.7	0.489	274.206	108.052
TM4-ECPL	405.288	151.517	59.7061	192.474	0.5246	163.852	64.5669
TM5	200.396	-53.3754	-21.0328	118.251	0.8019	93.3333	36.7785
MMM	200.212	-53.5596	-21.1054	159.038	0.4863	119.947	47.2656
Observations	253.772
modeldiversity	2.28929

## Sheet: NotoPeninsula
field=CCN02
MODEL	AVER	ME	NMB	RMSE	IOA	MAE	NME
CAM5-Chem-APM	589.617	-553.589	-48.4242	1013.39	0.4501	735.88	64.3699
CAM5-Chem-ATRAS2	540.213	-602.992	-52.7457	907.466	0.6184	672.319	58.81
CAM5-MAM4	560.868	-582.337	-50.939	906.1	0.5779	655.568	57.3447
CAM5_MAM3	505.176	-638.03	-55.8106	963.435	0.5139	693.818	60.6906
CAM5.3-Oslo	210.827	-932.379	-81.5583	1197.95	0.4599	939.869	82.2135
ECHAM5.5-HAM2-ELVOC_UH	301.087	-842.119	-73.6629	1071.06	0.5212	849.892	74.3429
ECHAM6-HAM2	266.06	-877.147	-76.727	1135.32	0.4778	881.403	77.0992
ECHAM6-HAM2-AP	219.266	-923.94	-80.8201	1181.01	0.4652	926.79	81.0694
EMAC	365.523	-777.683	-68.0266	1034.06	0.5833	798.474	69.8452
GEOS-Chem-APM	771.285	-371.921	-32.5331	745.955	0.696	519.787	45.4675
GEOS-Chem-TOMAS	665.993	-477.214	-41.7435	859.484	0.5503	605.054	52.9261
GISS-E2.1-MATRIX	756.999	-386.207	-33.7828	875.9	0.5323	606.524	53.0547
TM4-ECPL	372.582	-770.625	-67.4091	1001.02	0.5434	779.967	68.2263
TM5	482.019	-661.186	-57.8362	912.483	0.5992	685.643	59.9755
MMM	242.663	-900.542	-78.7734	1157.32	0.4713	903.702	79.0498
Observations	1143.21
modeldiversity	2.62711
field=CCN08
MODEL	AVER	ME	NMB	RMSE	IOA	MAE	NME
CAM5-Chem-APM	1180.61	-631.748	-34.8577	1712.3	0.3936	1092.19	60.2635
CAM5-Chem-ATRAS2	1174.3	-638.063	-35.2061	1538.72	0.5279	907.772	50.0878
CAM5-MAM4	1073.4	-738.966	-40.7736	1564.92	0.5281	919.118	50.7138
CAM5_MAM3	855.211	-957.152	-52.8124	1705.43	0.4479	1046.05	57.7174
CAM5.3-Oslo	596.151	-1216.21	-67.1064	1847.02	0.482	1270.77	70.1168
ECHAM5.5-HAM2-ELVOC_UH	471.164	-1341.2	-74.0029	1912.68	0.453	1348	74.378
ECHAM6-HAM2	334.108	-1478.25	-81.5651	2043.99	0.4262	1481.44	81.7407
ECHAM6-HAM2-AP	281	-1531.36	-84.4955	2089.82	0.421	1533.53	84.6148
EMAC	413.831	-1398.53	-77.1664	1954.08	0.4653	1407.06	77.6369
GEOS-Chem-APM	1324.56	-487.799	-26.9151	1452.8	0.5776	793.279	43.7705
GEOS-Chem-TOMAS	969.735	-842.627	-46.4933	1647.25	0.4484	999.02	55.1225
GISS-E2.1-MATRIX	2682.26	869.901	47.9982	1880.59	0.4543	1363.66	75.2419
TM4-ECPL	2423.39	611.021	33.7141	1725.58	0.6753	1108.33	61.1538
TM5	658.538	-1153.83	-63.6642	1772.75	0.4742	1178.14	65.0058
MMM	307.554	-1504.81	-83.0303	2066.27	0.4237	1507.39	83.1727
Observations	1812.36
modeldiversity	3.36445
field=N50
MODEL	AVER	ME	NMB	RMSE	IOA	MAE	NME
CAM5-Chem-APM	999.236	-771.666	-43.5747	1354.25	0.4979	1080.06	60.9892
CAM5-Chem-ATRAS2	1103.82	-667.08	-37.6689	1126.56	0.6672	878.163	49.5885
CAM5-MAM4	1304.95	-465.954	-26.3116	1016.88	0.7154	763.632	43.121
CAM5_MAM3	794.896	-976.005	-55.1134	1334.45	0.547	1037.39	58.58
CAM5.3-Oslo	4700.57	2929.68	165.434	6532.37	0.2635	3414.78	192.827
ECHAM5.5-HAM2-ELVOC_UH	412.812	-1358.09	-76.689	1628.6	0.5033	1364.23	77.0358
ECHAM6-HAM2	347.003	-1423.9	-80.4053	1699.66	0.4837	1428.83	80.6834
ECHAM6-HAM2-AP	285.038	-1485.87	-83.9044	1761.91	0.473	1489.46	84.1071
EMAC	634.915	-1135.99	-64.1473	1403.64	0.5924	1156.92	65.3295
GEOS-Chem-APM	1073.79	-697.111	-39.3647	1035.56	0.7212	805.962	45.5114
GEOS-Chem-TOMAS	1271.15	-499.751	-28.2201	1227.74	0.5373	927.846	52.394
GISS-E2.1-MATRIX	2502.21	731.31	41.2959	1363.68	0.5836	1087.9	61.4318
TM4-ECPL	1667.83	-103.07	-5.8202	889.592	0.8046	667.389	37.6864
TM5	670.081	-1100.82	-62.1615	1391.88	0.5574	1126.15	63.5918
MMM	316.021	-1454.88	-82.1548	1730.04	0.4785	1459.04	82.3895
Observations	1770.9
modeldiversity	3.55327
field=N80
MODEL	AVER	ME	NMB	RMSE	IOA	MAE	NME
CAM5-Chem-APM	731.438	-545.706	-42.7286	1008.53	0.4862	799.016	62.5627
CAM5-Chem-ATRAS2	808.059	-469.085	-36.7292	829.705	0.6933	645.098	50.511
CAM5-MAM4	1016.81	-260.334	-20.3841	752.288	0.7279	566.402	44.3491
CAM5_MAM3	637.547	-639.598	-50.0803	934.617	0.5617	723.202	56.6265
CAM5.3-Oslo	1532.67	255.525	20.0075	1526.6	0.5951	958.629	75.0604
ECHAM5.5-HAM2-ELVOC_UH	253.706	-1023.44	-80.1351	1228.27	0.4912	1026.62	80.3843
ECHAM6-HAM2	294.424	-982.72	-76.9467	1196.43	0.4947	988.984	77.4372
ECHAM6-HAM2-AP	250.658	-1026.48	-80.3735	1240.45	0.4836	1030.72	80.7053
EMAC	471.046	-806.099	-63.1174	1021.54	0.6136	828.207	64.8484
GEOS-Chem-APM	847.589	-429.555	-33.6341	721.567	0.7466	554.012	43.379
GEOS-Chem-TOMAS	1022.78	-254.362	-19.9164	793.985	0.6249	596.934	46.7398
GISS-E2.1-MATRIX	1518.3	241.155	18.8824	842.324	0.6432	640.677	50.1649
TM4-ECPL	454.116	-823.027	-64.4428	1022.41	0.5638	833.728	65.2807
TM5	553.964	-723.18	-56.6248	943.585	0.6108	750.303	58.7486
MMM	272.541	-1004.6	-78.66	1217.63	0.4893	1009.54	79.0467
Observations	1277.14
modeldiversity	2.89093
field=N120
MODEL	AVER	ME	NMB	RMSE	IOA	MAE	NME
CAM5-Chem-APM	500.467	-312.619	-38.4485	655.077	0.4786	509.934	62.7158
CAM5-Chem-ATRAS2	489.91	-323.177	-39.7469	560.466	0.7065	440.671	54.1972
CAM5-MAM4	685.831	-127.256	-15.651	505.561	0.7227	383.085	47.1149
CAM5_MAM3	456.493	-356.593	-43.8567	571.87	0.5808	445.114	54.7437
CAM5.3-Oslo	527.807	-285.279	-35.086	577.991	0.6598	450.623	55.4213
ECHAM5.5-HAM2-ELVOC_UH	155.441	-657.645	-80.8826	789.579	0.4815	659.649	81.129
ECHAM6-HAM2	231.312	-581.774	-71.5514	724.474	0.5097	589.668	72.5221
ECHAM6-HAM2-AP	208.631	-604.456	-74.3409	745.453	0.5009	610.413	75.0735
EMAC	369.952	-443.136	-54.5005	618.973	0.6635	488.531	60.0835
GEOS-Chem-APM	570.196	-242.892	-29.8728	487.409	0.7129	375.485	46.1802
GEOS-Chem-TOMAS	836.849	23.7609	2.9223	495.228	0.693	379.536	46.6784
GISS-E2.1-MATRIX	737.474	-75.6137	-9.2996	501.74	0.639	373.794	45.9722
TM4-ECPL	221.125	-591.963	-72.8045	714.103	0.5308	595.25	73.2087
TM5	455.708	-357.379	-43.9533	510.218	0.7158	398.369	48.9947
MMM	219.971	-593.116	-72.9462	734.125	0.5055	599.516	73.7334
Observations	813.087
modeldiversity	2.62511

## Sheet: overall
	mean NMB of MMM at stations	mean NMB of all models at all stations	min NMB all models all stations	max NMB all models all stations	mean NME of MMM at stations	mean NME of all models at all stations	min NME of all models all stations	max NME of alll models all stations	average IoA of MMM	IoA of all models at all stations	MIN average IoA of MMM	MAX average IoA of MMM
N50	-75.4091	-23.7405	-84.2511	326.726	78.1943	73.4344	32.9827	334.193	0.464212	0.528074
N80	-80.344	-33.0325	-87.3944	185.571	85.3547	65.644	34.9342	187.704	0.4589	0.564735
N120	-60.024	-34.7251	-87.6322	97.7269	67.9262	63.67	34.526	107.166	0.505225	0.583561
CCN0.2	-57.8092	-36.4207	-88.6536	145.424	69.6378	68.5051	39.7012	158.799	0.511289	0.550701
CCN1.0	-75.6982	-34.1186	-88.5879	253.259	78.5926	78.1047	28.5571	253.547	0.4338	0.474638
Nact_w03	-54.0391	-16.8362	-416.762	113.232	83.3746	68.5311	22.2216	430.054	0.4025	0.469109
Nact_w06	-60.7217	-22.0798	-327.086	116.351	80.3778	67.8861	26.5453	336.562	0.42136	0.502611
SO4		37.7641	-72.1249	301.024		96.8513			0.51155	0.518825	0.3479	0.6127
OA		-37.2757	-97.3486	216.03		74.5316			0.484667	0.522815	0.2778	0.6163

[truncated: 1 more sheets: readme]
