# Supplementary material for: Evaluation of global simulations of aerosol particle number and cloud condensation nuclei, and implications for cloud droplet formation
Source: Copernicus journal article supplement (doi:10.5194/acp-2018-1340), 2019-01-18
Supplement: Supplementary file [file acp-2018-1340-AC1-supplement.pdf]

Reply to Reviewer comments: Anonymous referee 1

*This comprehensive study is extremely useful as it highlights uncertainties in current model predictions of aerosol parameters that translate into uncertainties in cloud drop number concentrations. The manuscript is extremely well written and I only have some minor comments that should be addressed prior to publication. In large parts, the discussion of the model results is merely a description of the figures. I missed at several places, a more thorough discussion of the underlying potential reasons of discrepancies and comparison to prior model studies. Examples are listed in the following:*

Reply: We thank the reviewer for the positive comments and the very careful reading of the manuscript. We have now taken all of them into account in the revised version of the manuscript. More thorough discussion of the results have been added in the revised version of the manuscript. We provide here below a point-by-point reply to the specific comments.

*p. 10, l. 32: The sensitivity of CCN prediction at low supersaturations has been discussed in many previous studies and been ascribed to the sensitivity of  $N(\text{CCN})$  if the critical diameter is within the ‘steep’ section of the size distribution. Some references should be added here.*

Reply: As suggested we now refer to a few relevant references with appropriate comments :

‘Such hypothesis is supported by earlier studies that have observed large size-dependence of the sensitivity in activation fraction at low supersaturations and in the size ranges between 60 and 100 nm (Bougiatioti et al., 2011). Deng et al. (2013) reported inferred critical diameters varying by factors of 2-3 for low supersaturations from 0.2% to 0.06% and suggested the use of size-resolved particle number concentrations with inferred critical diameters or size-resolved activation ratios to predict CCN. Errors in CCN predictions have been shown to exceed 50% only at very low supersaturations (Reutter et al., 2009) and reach a factor of 2.4, while at high supersaturations CCN overestimate can be less than 5% (Ervens et al., 2007). The global near-surface mean CCN prediction error has been estimated at about 9% and regionally the maximum error can reach 40% (Sotiropoulou et al., 2007). The largest CCN prediction error was found in regions with low in-cloud  $s_{\text{max}}$ , like those affected by long-range transport of pollution or industrial pollution plumes, and the lower CCN prediction error in regions where in-cloud  $s_{\text{max}}$  is high, which is typical for pristine areas. Sotiropoulou et al. (2007) also found that the assumption of size-invariant chemical composition of internally mixed aerosol increases the error by a factor of two.’

*p. 13, 20-26: Is it expected that PPE simulations show this qualitative agreement with the MMM? What would it mean if there were no agreement?*

Reply: As explained in the last paragraph of section 2.1, PPE simulations consist of 235 simulations covering the most probable ranges of 26 parameters controlling aerosol processes and emissions perturbed simultaneously. Therefore it is expected that a combination of some of the PPE members will be very similar to MMM members and consequently that the PPE will qualitatively agree with the MMM, enabling the use of PPE results to identify some potential causes of uncertainty in CCN calculations compared to observations in section 5. If there was no agreement, it would mean that there are more parameters or processes that dominate the aerosol processes and/or emissions that are not considered in the PPE and therefore such an analysis would not have been possible.

A corresponding comment will be added at the end of section 3.2. 'The qualitative agreement between PPE and MMM indicates that the perturbed parameters are those having a significant control on aerosol processes and emissions and can be used for CCN uncertainty attribution in section 5.'

*p. 14, l. 5-7: Is this under prediction of total aerosol particle number a known bias in global models? Wouldn't it be then more useful to report CCN fractions, i.e.  $N(\text{CCN})/N_a$ ?*

Reply: Indeed, an earlier AEROCOM intercomparison of 12 global models by Mann et al. (2014) revealed a systematic underprediction across models in the number concentration of accumulation sizes that are relevant to CCN.

Following the reviewer's suggestion, we have calculated the activation ratios for  $N_{120}$  ( $\text{CCN}_{0.2}$  to  $N_{120}$ ),  $N_{80}$  ( $\text{CCN}_{0.2}$  to  $N_{80}$ ) and for  $N_{50}$  ( $\text{CCN}_{0.2}$  to  $N_{50}$ ) particles. None of these ratios shows consistent behavior between the models and observations at all stations. At some stations (e.g., Hyytiälä) the modeled activation fraction seems to agree with the observations within the observed variability, while at others (e.g. Melpitz, Finokalia and Noto Peninsula) it is totally different. This result supports the understanding that the aerosol number concentration cannot be used as a proxy for CCN levels since no fixed critical diameter can be specified at which an aerosol particle becomes a CCN. Activation of aerosols to CCN depends on the size distribution and the chemical composition of the aerosols as well as on the supersaturation that develops in clouds (e.g., Seinfeld and Pandis, 2006; Kalkavouras et al., ACPD 2018). As an example we show below the calculated activation fractions of  $N_{120}$  for Hyytiälä, Finokalia, Melpitz and Noto Peninsula.

For clarity we added the following sentence in the revised version. 'Note however that the aerosol number concentration cannot be used as a proxy for CCN levels since activation of aerosols to CCN depends not only on the size distribution but also on the chemical composition of the aerosols as well as on the supersaturation that develops in clouds (e.g., Seinfeld and Pandis, 2006; Kalkavouras et al., 2018).'

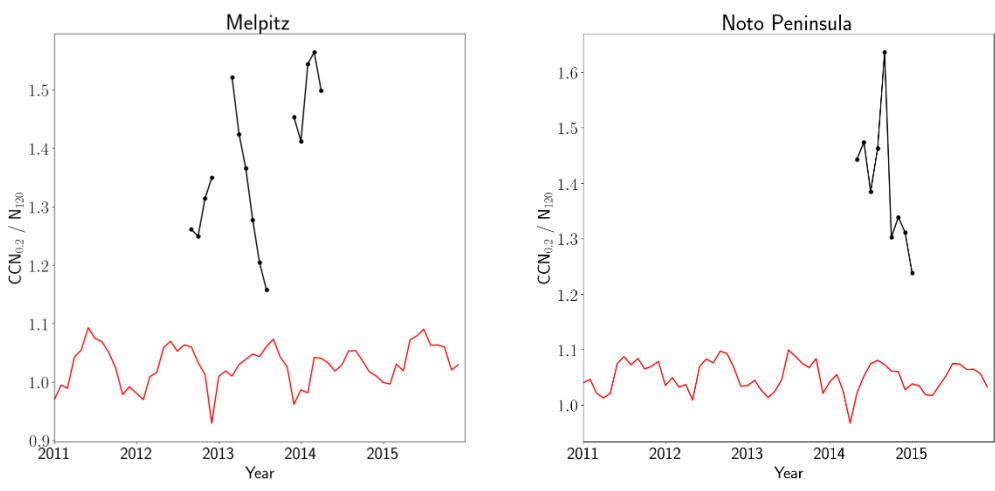

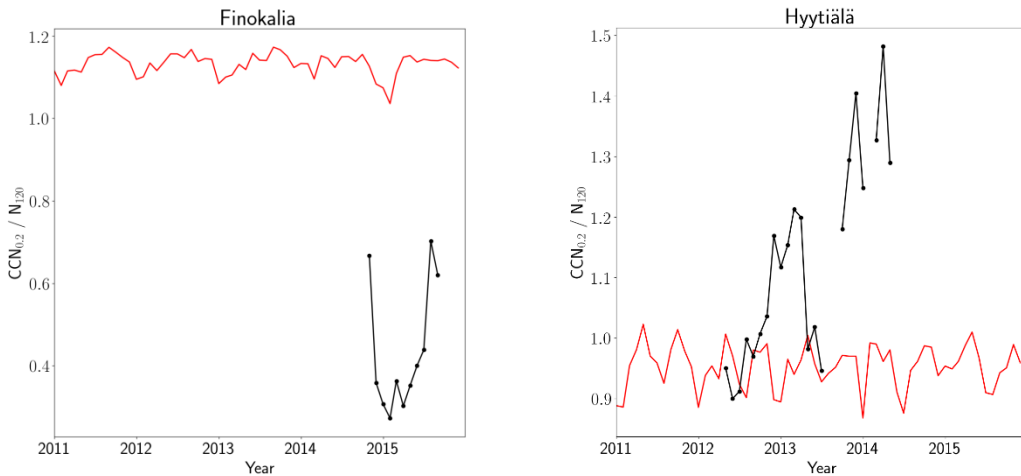

Figure: Activation fractions from the models (red lines) and from the observations (black lines) calculated as the ratio of CCN at 0.2% supersaturation to  $N_{120}$  (defined as the number concentration of aerosol particles having diameter larger than 120 nm).

*p. 15, l. 20: How do the parameterizations of wet deposition differ in the various models? I am quite certain that such descriptions have been discussed in previous model intercomparison and been identified as major causes of discrepancies. Such references should be added here.*

Reply: We now added a new table in the supplement (Table S4) with information on the parameterizations used in the models for dry and wet deposition in section 2.1 and we modified and extended this part of the discussion in section 3.4 as follows:

In section 2.1: ‘Both dry deposition and wet deposition of aerosol particles are taken into account in the participating models as shown in the supplementary Table S4. For the dry deposition models account for gravitational settling and for turbulence, thus these processes depend on the aerosol particle size. The omission of super-coarse particle sources associated with dust and sea-salt particles result in discrepancies between models, and, between model results and observations (Myriokefalitakis et al., 2016). Wet deposition parameterizations account for both in-cloud scavenging, which is sensitive to the solubility of aerosol particles, and below-cloud scavenging by convective and large-scale precipitation (Seinfeld and Pandis, 2006).’

In section 3.4: ‘In addition to atmospheric transport patterns, dry and wet deposition processes are presumably affecting the persistence time. Because the present exercise was not focusing on deposition of aerosols, it does not have the necessary elements to elaborate on differences in the results associated with differences in the deposition parameterizations. However, earlier global model comparisons provide insight to such differences. Tsigaridis et al. (2014) comparison of thirty-one global models among which those participating in the present study has shown that the representation of aerosol microphysics in the models was important for dry deposition. In particular, they have shown that the use of M7 aerosol microphysics module was associated with low dry deposition fluxes of organic aerosol, which is mainly fine aerosol in the models, and the dry deposition rate coefficient ranged from 0.005 to 0.13 day<sup>-1</sup>, i.e. with a max/min ratio of 26. They also found that the effective wet

deposition rate coefficient in the 31 participating models ranged from 0.09 to 0.24 day<sup>-1</sup>, i.e. with a max/min ratio of 2.6 that is 10 times lower than for dry deposition, and found virtually no change between AEROCOM phase I and AEROCOM phase II models. Kim et al. (2014) compared the deposition of dust, which is mainly coarse aerosol, calculated by a smaller subset (5) of AEROCOM models. They pointed out that the size distribution of dust differs among these models and found a 30% difference in the effective dry deposition rate coefficient and about the same in the total deposition rate varying from 0.28 to 0.37 day<sup>-1</sup>. Kim et al (2014) analysis also revealed differences in the annual precipitation rate and in its seasonal distribution in the models and a factor of 2 differences in the fraction of wet to the total deposition of dust among the models (ranging between 0.36 and 0.63). In addition the PPE results (see section 5) clearly show that dry deposition is one of the major factors of uncertainty in the calculations of CCN at 0.2% supersaturation. Kristiansen et al. (2016) investigated the causes of differences in aerosol lifetimes within 19 global models by making use of an observational constraint from radionuclide measurements and found largely underestimated accumulation-mode aerosol lifetimes due to too fast removal in most models. In particular, they found that the way aerosols are transported and scavenged in convective updrafts makes a large difference in aerosol vertical distribution and lifetimes, as revealed in their simulations from the same model (CAM5) but with different convective transport and wet removal treatments (Wang et al., 2013)".

*p. 16, l. 20-25: The relationship between N(CCN) and  $N_d$  as a function of  $w$  has been explored in many their etical studies (e.g. by Nenes, Feingold, Reutter and others). Can your 'qualitative example' here be related to them?*

Reply: This observed behavior is indeed based on the relationship between N(CCN) and  $N_d$ , but most studies discuss the slope ( $\partial N_d / \partial \text{CCN}$ ), evaluated at particular model states or the relative importance of input parameters that drive  $N_d$  variability. Very few studies actually discuss within the context of error propagation from CCN model-observation discrepancy to the implied cloud droplet number uncertainty, and none with the type of in-situ data (many locations, long time series) available here. In the introduction (page 5, paragraphs 1,2), relevant references are provided; in the revised manuscript, the aforementioned section will be referred to, we will also cite a few more manuscripts that directly discuss the issue of CCN error propagation to droplet number.

'In agreement with our finding, Sotiropoulou et al. (2006) using a similar approach applied to observations from the ICARTT field campaign estimated that a 20–50% error in CCN closure results in a 10–25% error in  $N_d$ , while global simulations suggest global average CCN prediction error between 10 and 20% and a smaller corresponding  $N_d$  error between 7 and 14% (Sotiropoulou et al., 2007). Such reduction in error can be explained by a self-regulation by  $N_d$  since  $S_{\max}$  decreases with increasing aerosol number concentration as discussed by many studies published to date (e.g., Twomey et al., 1959; Charlson et al., 2001; Nenes and Seinfeld, 2003; Feingold and Siebert, 2009), giving rise to regions where  $N_d$  is relatively insensitive to changes in CCN or updraft velocity (e.g., Rissman et al., 2004, and Reutter et al., 2017). At very high CCN levels, and in the presence of sufficient large hygroscopic CCN,  $N_d$  may actually decrease with increases in aerosol amount (Ghan et al., 1998; Feingold, 2001; McFiggans et al., 2006, Reuter et al., 2017); parameterizations that do not fully capture these important aspects of the aerosol-droplet relationship may also give rise to biases in aerosol indirect forcing assessments (e.g., Morales-Betancourt et al., 2014a).'

*p. 17, l. 20/21: What are the different assumptions on emission heights in the various models? How much of a discrepancy did the study by Daskalakis find?*

Reply: In the revised version we will provide a short discussion on the assumptions of biomass burning emission heights in the participating models.

Most of the participating models (new supplementary Table S4) follow the AEROCOM recommendation of biomass burning emission heights which in the boreal regions extend above 2 km and up to 6 km for the Canadian boreal fires (Dentener et al., 2006). ECHAM6-HAM2 and ECHAM6-HAM2-AP use a slightly different vertical distribution of biomass burning emissions with 75% within the planetary boundary layer (PBL), 17% in the first and 8% in the second level above the PBL (Tegen et al., 2018). EMAC assumes biomass burning emissions at 140 m and GEOS-Chem-APM well mixed in the boundary layer. This information is now added in section 2.1.

Furthermore, Daskalakis et al. (2015) found that the calculated tropospheric lifetimes of pollutants can differ by up to 30% when injected at heights following Dentener et al. (2006) compared to be emitted solely in the lowest model layer. Emitting aerosols in the free troposphere reduces their concentrations near surface and increases them in the middle troposphere; the largest differences of about 25% in the tropospheric column were calculated for the high latitudes over North America and China. Furthermore, Jian and Fu (2014) calculated 50–150% more BC at 700 hPa than when emitted in the boundary layer.

We rephrase the relevant sentence to provide relevant information in the revised manuscript: ‘Assumption of the injection height is also a source of discrepancy between models, leading to differences in the calculated lifetimes (up to 30%) and in the tropospheric columns (up to 25%) of pollutants (Daskalakis et al., 2015), while differences of an order of magnitude in their concentrations are computed for the middle troposphere (Jian and Fu, 2014). Thus, differences in the emission injection heights in the participating models, as outlined in section 2.1 and Table S4, contribute to the model results divergence’.

*p. 18, l. 11: Is there an explanation of the much higher concentration as found by Spracklen et al.?*

Reply: To be more precise in Spracklen et al (2011) paper (Figure 1c) CCN computed accounting for carbonaceous aerosols are in the range of 3,162-10,000 cm<sup>-3</sup> and these very high values are computed over China and attributed to carbonaceous aerosols acting as CCN.

For clarity in the revised version we rephrase this sentence accordingly. ‘This value is in the range of the 3,162-10,000 cm<sup>-3</sup> CCN<sub>0.2</sub> concentrations simulated by Spracklen et al. (2011) over China and attributed to carbonaceous aerosols acting as CCN.’

*p. 21, l. 2: Your findings are in agreement with the concept of aerosol-‘vs ‘updraft-limited’ regimes. That should be repeated here.*

Reply: This comment has also been raised above. Please see our related response; a similar reference is made at this point in the text as well:

“and support the concept of existence of two distinct regimes the aerosol-limited and the updraft-limited.” Is added at the end of the sentence.

## **Minor comments**

*Title: I think the title should be reworded and 'number' should be moved: Evaluation of global simulations of aerosol particle and cloud condensation nuclei number, and implications for cloud droplet formation'*

Reply: We moved 'number' as suggested

*p. 4, l. 9: This sentence implies that particle size also determines hygroscopicity –which is not true as hygroscopicity is a mass-related parameter. Please reword.*

Reply: We thank the reviewer for pointing out this misleading sentence, we rephrased as following: 'Although less important than particle size for CCN formation, particle chemical composition determines aerosol hygroscopicity'.

*p. 6, l. 14: 'one of the different binary homogenous nucleation' sounds weird. Please reword.*

Reply: We removed 'one of the different'

*p. 6, l. 29-p. 7, l. 3: It might be easier to list this information in a table.*

Reply: This table exists in the supplement (Table S2). The text is meant to be a brief outline of the discussion in S1 and the table S2 in the supplement. In the revised version we explicitly direct the reader to supplementary table S2:

'Supplementary tables S1, S2, S3, and S4 provide a summary of the main features of the participating model. Further details are provided in these tables.'

*p. 8, l. 4, l. 9 and later: In the reference list, Schmale 2017a and 2017b are listed whereas in the text Schmale et al., 2017 and 2018 are cited. Please correct.*

Reply: We thank the reviewer for pointing out this discrepancy. We updated the reference list to use include the finally published paper Schmale et al., 2018 in Atmos. Chem. Phys.

*p. 8, l. 20: 'the chemical composition...': There seems to be a verb missing in this fragment.*

Reply: We replaced the semi-column by 'as well as'.

*p. 10, l. 16: why 'would no doubt affect'? I think it is safe to say that 'no doubt affects...'*

Reply: It is now corrected as suggested.

*p. 11, l. 29: higher summer time values...*

Reply: done

*p. 12, l. 27: I suggest rewording to 'an insufficient number of small particles are predicted to activate in the model'*

Reply: this is modified as suggested by the reviewer

*p. 12, l. 29: remove 'the' (for all stations...)*

Reply: done

*p. 14, l. 19: Where does the parenthesis close?*

Reply: The parenthesis closes after the %

*p. 14, l. 19: remove 'the' (by nine of the models...)*

Reply: done

*p. 14, l. 19: I do not understand the fragment 'not systematically the same models at all stations'*

Reply: We mean that there are no specific models that systematically perform better than others, as we explained in the sentence that was following 'Because different models are appearing as outliers at each station...' To avoid confusion we removed the fragment in question.

*p. 15, l. 2: Has 'persistence' been defined anywhere earlier? (I might have missed it). Is it the time a CCN spends in the atmosphere?*

Reply: In page 9, line 2 section 2.4 subsection 'CCN persistence' we define it as 'the duration for which the CCN number concentrations remains similar to its earlier concentration, the autocorrelation ...' as we direct the reader to the publication by Schmale et al 2018.

For clarity that sentence in section 2.4 now reads as follows: 'To investigate the duration for which the CCN number concentrations remains similar to its earlier concentration, the so-called persistence, the autocorrelation...'

*p. 18, l. 23/4: Given that the referenced figures are in supplement, the 'significant differences' should be more explicitly discussed here.*

Reply: Following the reviewer's suggestion appropriate discussion has been added: 'In particular, for all models near-surface BC distributions maximize over China, while individual models differ by a factor of 3 to 4. Simulated SS distributions maximize over the southern oceans where the models show the largest differences up to 2 orders of magnitude reflecting large differences in the parameterized emissions of SS (see also supplementary Table S3). Finally, DU distributions show the largest spread among models with near surface values that differ up to a factor of 40.'

*p. 19, l. 3-21: It would help a lot to connect this text to Figure 11, if the abbreviations from the figure legend are added to the text. Some of them are not intuitive.*

Reply: The abbreviations will be explained in the Figure caption for clarity:

'Abbreviations are: BL\_Nuc : Boundary layer nucleation; Ageing : Ageing "rate" from insoluble to soluble ; Acc\_Width : Modal width (accumulation soluble/insoluble) ; Ait\_Width : Modal width (Aitken soluble/insoluble); Cloud\_pH : pH of cloud drops; Carb\_FF\_Ems : Particle mass emission rate for BC and OC (fossil fuel); Carb\_BB\_Ems : Particle mass emission rate for BC and OC (biomass burning); Carb\_Res\_Ems : Particle mass emission rate for BC and OC (biofuel) ;Carb\_FF\_Diam : Particle emitted mode diameter for BC and OC (fossil fuel); Carb\_BB\_Diam : Particle emitted mode diameter for BC and OC (biomass burning) ; Carb\_Res\_Diam : Particle emitted mode diameter for BC and OC (biofuel);

Prim\_SO4\_Frac : Mass fraction of SO<sub>2</sub> converted to new SO<sub>4</sub><sup>-2</sup> particles in sub-grid power plant plumes; Prim\_SO4\_Diam : Mode diameter of new sub-grid SO<sub>4</sub><sup>-2</sup> particles ; Sea\_Spray : Sea spray mass flux (coarse/accumulation); Anth\_SO2 : SO<sub>2</sub> emission flux (anthropogenic) ; Volc\_SO2 : SO<sub>2</sub> emission flux (volcanic); BVOC\_SOA : Biogenic monoterpene production of SOA; DMS : DMS emission flux; Dry\_Dep\_Ait : Dry deposition velocity of Aitken mode aerosol ; Dry\_Dep\_Acc : Dry deposition velocity of accumulation mode aerosol; Dry\_Dep\_SO2 : Dry deposition velocity of SO<sub>2</sub> ; Kappa\_OC : Hygroscopicity parameter Kappa for organic aerosols. Default value in UKCA is 0.06. See Petters and Kreidenweis 2007 ACP; Sig\_W : Standard deviation of updraft velocity. (This affects activation of aerosol particles to form cloud droplets.); Dust : dust emission flux; Rain\_Frac : The fraction of the cloudy part of the gridbox where rain is forming and hence scavenging takes place; Cloud\_Ice\_Thresh : Scavenging (by both cloud liquid and ice water) is suppressed in dynamic clouds when cloud ice fraction is higher than this value.'

*p. 19, l. 18: 'in-cloud oxidation of SO<sub>2</sub>' is not explicitly included in the parameters in Figure 11. Is it connected to uncertainties in pH?*

Reply: Yes this is connected to uncertainties in cloud pH. It is now clarified in the text.

*p. 26, l. 15 and l. 17: The second of these two references seems wrong and redundant.*

Reply: The reference has been removed

*Figures 2 and 6, caption: 'dots and dashed lines' and 'bold points and dashed lines', respectively, is confusing as the dashed lines are model results. I think it should be sufficient to say 'observational data is shown with symbols' (unless I misunderstand something here).*

Reply: We thank the reviewer for this suggestion and we have changed the caption accordingly.

*Figure 7: It would be much easier to understand the figure if you added a legend with 'observation winter', 'observation summer', 'model winter', 'model summer'*

Reply: In the revised version we added the proposed legend.

*Figure 8: Is Smax shown in %?*

Reply: Yes this is now specified in the axis title and in the caption.

*Figure 9, caption: 'blue colored values' sounds strange (values don't have colors). I suggest rewording to 'all NCCN at smax (blue symbols) have been divided by 2'*

Reply: The caption has been rephrased accordingly.

*Figure 11: a) I understand that details about the analysis will be presented by Yoshioka et al. However, given that this paper is still in preparation, I suggest adding a list of all parameters, their meaning and ranges. b) Sum of the bars do not add up to 100%. Is the rest then the sum of the last four parameters, i.e. Carb\_BB\_diam, carb\_res\_diam, Sig\_w, and Dust?*

Reply:



- a) The paper by *Yoshioka et al.* is now under review. We have added this reference in the manuscript and we also added in the figure caption the meaning of the parameters as provided earlier.
- b) Furthermore, figure 11 only shows individual parameter contributions to uncertainty greater than or equal to 1%. All contributions smaller than 1% are not shown (this is now clearly stated in the figure caption). These may be other individual parameter contributions as well as joint interaction terms. The difference between the height of the bars and 100% corresponds to these terms. This also means that not all parameters (colors) in the legend will appear in every column. The parameters carb\_BB\_diam, carb\_res\_diam, Sig\_w, and Dust have no color as these parameters do not contribute to any column in any of the plots (there are no cases where the contribution to uncertainty from these parameters is  $\geq 1\%$ ).

## References

Bougiatioti, A., Nenes, A., Fountoukis, C., Kalivitis, N., Pandis, S. N., and Mihalopoulos, N.: Size-resolved CCN distributions and activation kinetics of aged continental and marine aerosol, *Atmos. Chem. Phys.*, **11**, 8791-8808, <https://doi.org/10.5194/acp-11-8791-2011>, 2011.

Charlson, R.J., Seinfeld, J. H., Nenes, A., Kulmala, M., Laaksonen, A., Facchini, M. C.: Reshaping the Theory of Cloud Formation, *Science*, **292**, 2025-2026, 2001. Deng, Z. Z., Zhao, C. S., Ma, N., Ran, L., Zhou, G. Q., Lu, D. R., and Zhou, X. J.: An examination of parameterizations for the CCN number concentration based on in situ measurements of aerosol activation properties in the North China Plain, *Atmos. Chem. Phys.*, **13**, 6227-6237, 2013.

Dentener, F., et al.: Emissions of primary aerosol and precursor gases in the years 2000 and 1750 prescribed datasets for AeroCom, *Atmos. Chem. Phys.*, **6**, 4321-4344, doi:10.5194/acp-6-4321-2006, 2006.

Evens, B., M. Cubison, E. Andrews, G. Feingold, J. A. Ogren, J. L. Jimenez, P. DeCarlo, and A. Nenes, Prediction of cloud condensation nucleus number concentration using measurements of aerosol size distributions and composition and light scattering enhancement due to humidity, *J. Geophys. Res.*, **112**, D10S32, 2007. doi:10.1029/2006JD007426, 2007.

Feingold, G.: Analysis of smoke impact on clouds in Brazilian biomass burning regions: An extension of Twomey's approach, *J. Geophys. Res.*, **106**, 22 907-22 922, 2001.

Feingold, G., Siebert, H. : Cloud-Aerosol Interactions from the Micro to the Cloud Scale, in *Clouds in the Perturbed Climate System: Their Relationship to Energy Balance, Atmospheric Dynamics, and Precipitation*, Ed J. Heintzenberg & R. J. Charlson, MIT Press, 2009.

McFiggans, G., Artaxo, P., Baltensperger, U., Coe, H., Facchini, M. C., Feingold, G., Fuzzi, S., Gysel, M., Laaksonen, A., Lohmann, U., Mentel, T. F., Murphy, D. M., O'Dowd, C. D., Snider, J. R., and Weingartner, E.: The effect of physical and chemical aerosol properties on warm cloud droplet activation, *Atmos. Chem. Phys.*, **6**, 2593-2649, <https://doi.org/10.5194/acp-6-2593-2006>, 2006.

Morales Betancourt, R., and Nenes, A.: Understanding the contributions of aerosol properties and parameterization discrepancies to droplet number variability in a Global Climate Model, *Atmos. Chem. Phys.*, **14**, 4793-4807, 2014

Jian, Y. and Fu, T.-M.: Injection heights of springtime biomass burning plumes over peninsular Southeast Asia and their impacts on long-range pollutant transport, *Atmos. Chem. Phys.*, **14**, 3977-3989, doi:10.5194/acp-14-3977-2014, 2014.

Kalkavouras, P., Bougiatioti, A., Kalivitis, N., Tombrou, M., Nenes, A., and Mihalopoulos, N.: Regional New Particle Formation as Modulators of Cloud Condensation Nuclei and Cloud Droplet Number in the Eastern Mediterranean, *Atmos. Chem. Phys. Discuss.*, <https://doi.org/10.5194/acp-2018-1254> under revision.

Kim, D., et al. : Sources, sinks, and transatlantic transport of North African dust aerosol: A multimodel analysis and comparison with remote sensing data, *J. Geophys. Res. Atmos.*, 119, 6259–6277, doi:10.1002/2013JD021099, 2014.

Kristiansen, N. I., Stohl, A., Olivíe, D. J. L., Croft, B., Søvde, O. A., Klein, H., Christoudias, T., Kunkel, D., Leadbetter, S. J., Lee, Y. H., Zhang, K., Tsigaridis, K., Bergman, T., Evangeliou, N., Wang, H., Ma, P.-L., Easter, R. C., Rasch, P. J., Liu, X., Pitari, G., Di Genova, G., Zhao, S. Y., Balkanski, Y., Bauer, S. E., Faluvegi, G. S., Kokkola, H., Martin, R. V., Pierce, J. R., Schulz, M., Shindell, D., Tost, H., and Zhang, H.: Evaluation of observed and modelled aerosol lifetimes using radioactive tracers of opportunity and an ensemble of 19 global models, *Atmos. Chem. Phys.*, 16, 3525–3561, <https://doi.org/10.5194/acp-16-3525-2016>, 2016.

Liu, X., Easter, R. C. C., Ghan, S. J. J., Zaveri, R., Rasch, P., Shi, X., Lamarque, J.-F. F., Gettelman, A., Morrison, H., Vitt, F., Conley, A., Park, S., Neale, R., Hannay, C., Ekman, A. M. L. M. L., Hess, P., Mahowald, N., Collins, W., Iacono, M. J., Bretherton, C. S. S., Flanner, M. G. G. and Mitchell, D.: Toward a minimal representation of aerosols in climate models: Description and evaluation in the Community Atmosphere Model CAM5, *Geosci. Model Dev.*, 5(3), 709–739, doi:10.5194/gmd-5-709-2012, 2012.

Morales Betancourt, R. and Nenes, A.: Understanding the contributions of aerosol properties and parameterization discrepancies to droplet number variability in a global climate model, *Atmos. Chem. Phys.*, 14(9), 4809–4826, doi:10.5194/acp-14-4809-2014, 2014a.

Morales Betancourt, R., and Nenes, A.: Aerosol Activation Parameterization: The population splitting concept revisited, *Geosci.Mod.Dev.*, 7, 2345–2357, 2014b.

Nenes, A. and Seinfeld, J.H. Parameterization of cloud droplet formation in global climate models *J.Geoph.Res*, 108 (D7), 4415, doi: 10.1029/2002JD002911, 2003.

Reutter, P., Su, H., Trentmann, J., Simmel, M., Rose, D., Gunthe, S. S., Wernli, H., Andreae, M. O., and Pöschl, U.: Aerosol- and updraft-limited regimes of cloud droplet formation: influence of particle number, size and hygroscopicity on the activation of cloud condensation nuclei (CCN), *Atmos. Chem. Phys.*, 9, 7067–7080, <https://doi.org/10.5194/acp-9-7067-2009>, 2009.

Rissman, T., Nenes, A. and Seinfeld, J.H. Chemical amplification (or dampening) of the Twomey effect: Conditions derived from droplet activation theory, *J.Atmos.Sci.*, 61(8), 919–930, 2004.

Sotiropoulou, R.E.P, Medina, J., Nenes A. CCN predictions: is theory sufficient for assessments of the indirect effect?, *Geoph.Res.Let.*, 33, L05816, doi:10.1029/2005GL025148, 2006.

Sotiropoulou, R.E.P., A. Nenes, P. J. Adams, and J. H. Seinfeld, Cloud condensation nuclei prediction error from application of Kohler theory: Importance for the aerosol indirect effect, *J. Geophys. Res.*, 112, D12202, doi:10.1029/2006JD007834. 2007.

Spracklen, D. V., Carslaw, K. S., Pöschl, U., Rap, A. and Forster, P. M.: Global cloud condensation nuclei influenced by carbonaceous combustion aerosol, *Atmos. Chem. Phys.*, 11(17), 9067–9087, doi:10.5194/acp-11-9067-2011, 2011.

Tegen, I., Neubauer, D., Ferrachat, S., Siegenthaler-Le Drian, C., Bey, I., Schutgens, N., Stier, P., Watson-Parris, D., Stanelle, T., Schmidt, H., Rast, S., Kokkola, H., Schultz, M., Schroeder, S., Daskalakis, N., Barthel, S., Heinold, B., and

Lohmann, U.: The aerosol-climate model ECHAM6.3-HAM2.3: Aerosol evaluation, *Geosci. Model Dev. Discuss.*, <https://doi.org/10.5194/gmd-2018-235>, in review, 2018

Twomey, S.: The nuclei of natural cloud formation. II The supersaturation in natural clouds and the variation of cloud droplet concentration, *Geofisica Pura Appl.*, 43, 243–249, 1959.

Wang, H., Easter, R. C., Rasch, P. J., Wang, M., Liu, X., Ghan, S. J., Qian, Y., Yoon, J.-H., Ma, P.-L., and Vinoj, V.: Sensitivity of remote aerosol distributions to representation of cloud–aerosol interactions in a global climate model, *Geosci. Model Dev.*, 6, 765–782, doi:10.5194/gmd-6-765-2013, 2013.

Yoshioka, M., L. A. Regayre, K. J. Pringle, J. S. Johnson, G. W. Mann, D. G. Partridge, D. M. H. Sexton, G. M. S. Lister, N. Schutgens, P. Stier, Z. Kipling, N. Bellouin, J. Browse, B. B. Booth, C. E. Johnson, B. Johnson, J. D. P. Mollard, L. Lee and K. S. Carslaw, *Ensembles of Global Climate Model Variants Designed for the Quantification and Constraint of Uncertainty in Aerosols and their Radiative Forcing*. *The Journal of Advances in Modeling Earth Systems*. Under review, 2019
